# 1 Customizing material into embodied cap 2 by sponge crab

3 Keita Harada<sup>1</sup> and Katsushi Kagaya<sup>1,2\*</sup>

4 (1) Seto Marine Biological Laboratory, Field Science Education and Research Center, Kyoto University, 459  
5 Shirahama, Nishimuro, Wakayama 649-2211 Japan

6 (2) The Hakubi Center for Advanced Research, Kyoto University, Yoshida-Honmachi, Sakyo-ku, Kyoto  
7 606-8501, Japan

8 \*Author for correspondence (kagaya.katsushi.8e@kyoto-u.ac.jp)

## 9 Abstract

10 Getting camouflaged with environmental material can improve survivability of animals. How animals select  
11 and fit some material into their body design remains unclear. To address the question, we examined the  
12 cap making behavior of the sponge crab, *Lauridromia dehaani* that carries a natural sponge as a cap. We  
13 analyzed their preference to the size of artificial sponge, the whole area size of the cap that the crabs cut off,  
14 and its hole size of the caps that the crabs customize to make it suitable for their body. Three different sizes  
15 of artificial sponge were given to the crabs experimentally so that they chosen one sponge among them. We  
16 video recorded the process of the cap making behavior, and measured the size of caps. Although a particular  
17 fixed behavioral pattern was observed in the cap making behavior, the choice and hole size considerably varied  
18 even in a single individual. To fully consider the individuality, we constructed statistical models including  
19 hierarchical models. We inferred the posterior distributions of the parameters in several models, and built  
20 up the predictive distributions of the models by a Bayesian approach. The model selection based on WAIC  
21 (Widely-Applicable Information Criterion) and posterior information from the models revealed that large  
22 individuals tended to choose large sponges with the variability specific to each individual. Furthermore, the  
23 individual-specific tendency was found in the relationship of the carapace width and the cap hole size. These  
24 analyses imply that the crabs update the cap making behavior by recalibration, given that they have to molt  
25 to become large. These findings might give a new insight into body extending capability of crustaceans.

26 *Key words: embodiment, camouflage, sponge crab, hierarchical Bayesian approach, tool making*

## 27 Introduction

28 Extending body by attaching some living or non-living material obtained from the environment is widespread  
29 in the animal kingdom. After some material is attached, it is often to be assimilated into a whole body in  
30 vertebrates and invertebrates (Blanke and Metzinger, 2009; Sonoda et al., 2012; Wilby et al., 2018). Even if  
31 the material is not appropriate to the design by themselves, animals can make them suitable by processing  
32 and customizing them (Hunt, 1996). However, how animals select suitable material and how they process  
33 them to embody the material under controlled experimental condition, remain obscure.

34 The behavior of the marine crabs decorating themselves can offer a clue to address the questions. They are  
35 known to use materials such as Porifera, Ascidiacea, or algae. The majid crabs decorate themselves with  
36 some sponges and algae (Maldonado and Uriz, 1992; Wicksten, 1993; Bedini et al., 2003; Berke and Woodin,  
37 2008; De Carvalho et al., 2016). Crabs of the family Dromiidae (Dembowska, 1926; Mclay, 1983; Bedini et  
38 al., 2003), Homolidae (Wicksten, 1985; Braga-Henriques et al., 2011; Capezzuto et al., 2012), and Dorippidae  
39 (Bedini et al., 2003) are reported to carry sponges and ascidians. It is suggested that these behaviors are  
40 mainly camouflage and defense to predators (e.g. Thanh et al., 2005). In particular, the toxic character of  
41 sponges is more effective to protect crabs against the attacks of predators (e.g. Bedini et al., 2003).

42 Among these crabs, dromids can detach sponges or ascidians from the substrate and make caps (Dembowska,  
43 1926; McLay, 1983). The cap has concave surface on the bottom, and the dromid crabs put it on to their back.  
44 The crabs have a fixed spine on the propodus of the fourth and fifth pairs of the pereopods, and the dactylus  
45 can move opposite direction, so they can use the legs just like chelae to grasp and stretch the cap (Fig. 1A).  
46 In the field research, one study dealt with the preference of dromids to materials for caps and the correspondence  
47 of the size of cap to the size of crab (McLay, 1983). It is reported that *Cryptodromia hilgendorfi* use the caps  
48 made by many species of sponges, but they prefer the sponge *Suberites carnosus*, and the crabs make sponge  
49 caps twice as large as the carapace area. In the research, natural sponges were used for making caps and the  
50 hole size was not measured.

51 In the experimental research, the preference to the size of material and the suitability between the size of  
52 crabs and the caps are scarcely investigated. Dembowska (1926) reported qualitatively that the size of caps  
53 made by *Dromia personata* (reported as *D. vulgaris*) with paper is as large as the size of those that the crabs  
54 originally carried. *Dromia personata* mainly uses sponges and ascidians (Bedini et al., 2003), while they can  
55 also make caps with paper (Dembowska, 1926).

56 In this study, we focused on a species of sponge crab: *Lauridromia dehaani*. In order to experimentally control  
57 the sponge size and its condition, we gave different sizes of artificial sponges to the crabs. We examined the  
58 relationship of the carapace size with the size of sponge the animal select, the size of cap holes, and the time  
59 they took for cap making. To explore and extract the patterns from these relationships with the individuality  
60 specific to each animal, we constructed the statistical models implementing the individuality as hierarchical  
61 structure in the parameters. We applied the models to the data and computed the posterior distribution  
62 of the parameters by a Bayesian approach. The predictabilities of the multiple models were evaluated by  
63 the widely applicable information criterion (WAIC, Watanabe, 2010), because it can be applicable to the  
64 cases that the posterior distribution of the parameters does not resemble any normal distribution such as  
65 hierarchical Bayesian models(Watanabe, 2018).

## 66 **Materials and methods**

### 67 **Animal collection**

68 From December 2015 to April 2017, 38 individuals (20 males, 18 females) of *Lauridromia dehaani* (Brachyura:  
69 Dromiidae) were obtained from the Sakai fishing port, Minabe town, Wakayama prefecture, Japan (33° 44'N,  
70 135° 20'E). We conducted the experiments in the tanks at Shirahama Aquarium, Seto Marine Biological  
71 Laboratory, Kyoto University (33° 41'N, 135° 20'E), from December 2015 to June 2017. Before the experiments,  
72 all individuals were maintained in the tanks (19.5–23.8 °C) of the aquarium more than two days to make  
73 them get used to the environment. We measured the carapace width of them (Fig. 1B), and the individuals  
74 were divided into five classes whether they lacked any of the fourth and fifth pereopods: (A) only one of  
75 them was absent, (B) either of both side were absent, (C) both of the fourth and fifth of each side were  
76 absent, (D) more than three were absent, (O) none of the fourth and fifth pereopods were absent. In this  
77 study, the specimens that classed B or D were not collected, so that we just used the categories, A, C, and O.

### 78 **Experimental setup and procedure**

79 We cut the melamine sponge into three classes of size (S: 20 mm × 30 mm × 40 mm, M: 30 mm × 60 mm ×  
80 85 mm, L: 30 mm × 140 mm × 150 mm). Each sponge was put pseudorandomly to the either sides and the  
81 center behind of the cage (700 mm × 470 mm × 190 mm, Fig. 1C), which floated in the tank. Then, crabs  
82 were introduced to the front center of the cage, thereby the distance between each sponge and the crab was  
83 equal.

84 We checked whether the crab carried any sponge once a day in the morning. If it did, we collected the  
85 sponge, otherwise the crab and the three sponges remained in the cage. When the crab did not carry any  
86 sponge for five days, we stopped the experiment. First we performed one experiment for one individual, but  
87 five experiments for one individual after February 2017 to examine the individuality of the behavior. We  
88 thoroughly desiccated the sponges that the crabs processed, measured the whole area of them, and the area of  
89 the hole (Fig. 2) by taking pictures from 46 cm above the sponges.

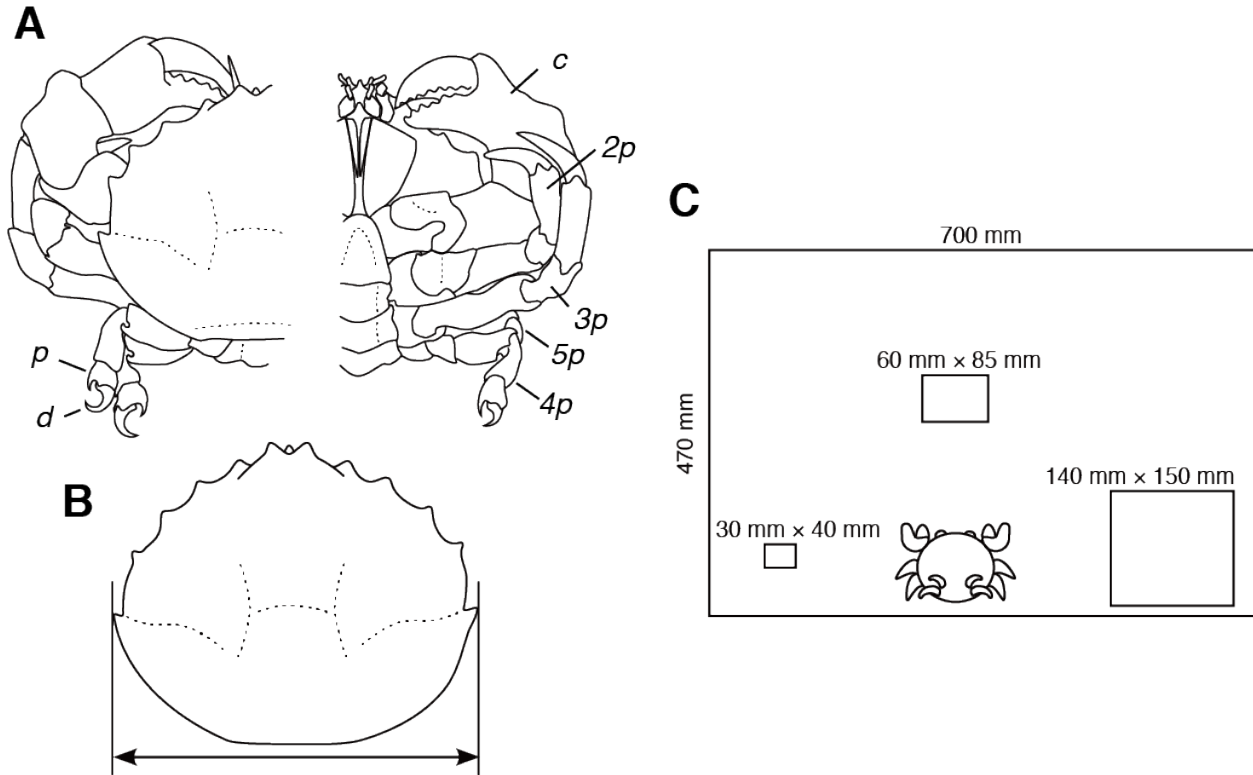

Figure 1: **Experimental animal and setup.** (A) A drawing of *Lauridromia dehaani*; p—propodus of fifth pereiopod; d—dactylus of fifth pereiopod; c—chela (1st pereiopod); 2p—second pereiopod; 3p—third pereiopod; 4p—fourth pereiopod; 5p—fifth pereiopod; (B) carapace width; (C) position of the three different sizes of sponge and the crab in the experiment.

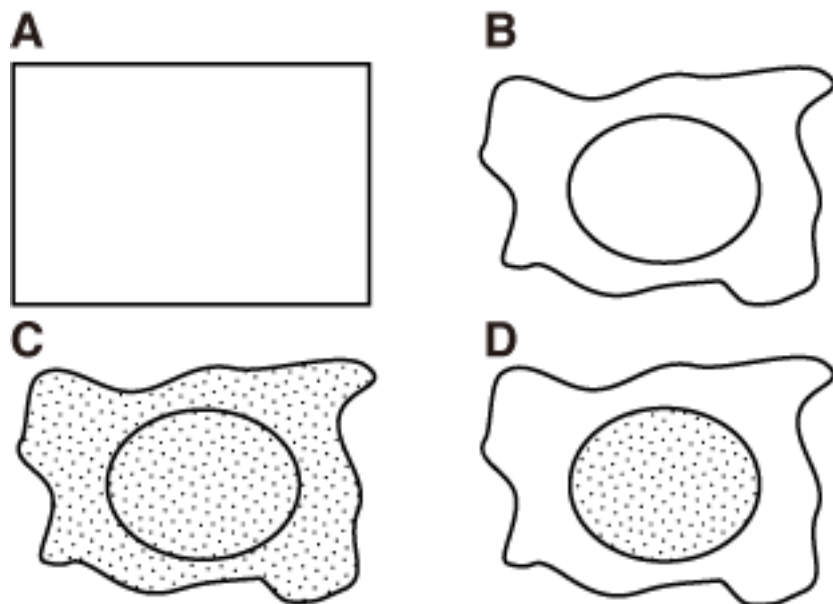

Figure 2: **The examples of the area of sponge.** (A) a sponge before process; (B) after process; (C) the whole area of this sponge; (D) the area of the hole.

## 90 **Statistical modeling**

91 In order to quantify and extract the structure of the behavioral aspects including individuality, we explored 26  
92 statistical models constructed for the four different aspects of the behavior: (1) choice of sponge size (6 models),  
93 (2) cutting behavior (8 models), (3) cap hole making behavior (6 models), (4) time until carrying the sponge (6  
94 models). In either case, we have constructed the models that explicitly includes individuality as the hierarchical  
95 (or multi-level) models and computed the posterior distribution of the parameters. We implemented the  
96 models in a probabilistic programming language Stan (Stan Development Team, 2017; Matsuura, 2016).  
97 We used non-informative uniform priors for the parameters unless it is explicitly described. The performed  
98 sampling from the posterior distributions using No-U-Tern Sampler (NUTS), which is implemented as a  
99 Hamiltonian Monte Carlo (HMC) sampler. Whether the sampling was converged was diagnosed by trace  
100 plots and quantitatively via the Gelman-Rubin convergence statistic,  $R_{hat}$  (Gelman and Rubin, 1992). All of  
101 the draws were judged to converge when  $R_{hat} < 1.10$ .

102 We compared the predictabilities of the models using WAIC (Watanabe, 2010). To give the essence of the  
103 models, we will explain only the best performed models in terms of WAIC in this section. The other models  
104 are, for example, without the explanatory variables or without the individuality (Table 2). It should be noted  
105 that WAIC can be computed in different ways depending on what we want to predict the data (Watanabe,  
106 2018). In our case, we are interested in the prediction of a new data when we get a new individual and  
107 get a new behavioral act instead of the prediction of a new behavioral act from the individuals sampled  
108 in this study. Therefore, for the hierarchical models, we have to integrate out the parameters applied  
109 to each individual. We performed numerical integration of the local parameters defining the hierarchy  
110 to average out. For facilitating the understanding of this point in more simpler linear models, see the  
111 [post\(http://rpubs.com/katzkagaya/460937\)](http://rpubs.com/katzkagaya/460937).

112 All the computations were performed in the statistical environment R(R Core Team, 2018) and the Stan  
113 codes for each model were compiled and executed through the R package *rstan* (Stan Development Team,  
114 2017). All the source codes and data are available from a gist repository ([https://gist.github.com/kagaya/  
115 3188dd0a4571b068e501aeef9863e255](https://gist.github.com/kagaya/3188dd0a4571b068e501aeef9863e255)).

### 116 **behavioral choice of material size (model 1\_1)**

117 The tendency to a choice of a certain sponge  $\mu[n, m]$  ( $m = 1, 2, 3$  for M, L, no choice, respectively) is expressed  
118 as the linear predictor in terms of the carapace width,  $Cwidth[n]$  and the degree of leg lack,  $LegLack[n]$ . The  
119 choice for M size was fixed to zero, and the parameters of other two choices were inferred as the comparison  
120 with the M size choice.

$$\mu[n, 1] = 0$$

121

$$\mu[n, 2] = a_{choice_L}[ID[n]] + b_{choice_L} * Cwidth[n] + c_{choice_L} * LegLack[n]$$

122

$$\mu[n, 3] = d_{choice_0}[n] + e_{choice_0} * Cwidth[n] + f_{choice_0} * LegLack[n]$$

123

$$n = 1, \dots, N_{act}$$

124  $N_{act}$  is the total number of the behavioral acts.  $ID$  represents animal identity. The local parameters  
 125  $a_{choice_L}[ID[n]]$  are the intercepts for each individual. The parameter  $d_{choice_0}[n]$  does not include individuality  
 126 as represented, because the choice of “no choice” observation was only from one individual. The  $a_{choice_L}[ID[n]]$   
 127 as a random variable is subjected to normal distribution with the mean  $a_{choice_{L0}}$  and standard deviation  
 128  $a_{choice_{Ls}}$ .

$$a_{choice_L}[k] \sim Normal(a_{choice_{L0}}, a_{choice_{Ls}})$$

129

$$k = 1, \dots, N_{animal}$$

130 The actual choice  $Choice[n]$  is subjected to the categorical distribution via the softmax function.

$$Choice[n] \sim Categorical(softmax(\mu[n, ])), n = 1, \dots, N_{act}$$

### 131 **cutting behavior (model 2\_1)**

132 The probability  $\phi[n]$  for the decision whether the animal cut off the sponge can be linked to the linear  
 133 predictor with the terms of carapace width,  $Cwidth[n]$  and selected sponge size,  $Choice[n]$ .

$$\phi_{cut}[n] = InverseLogit(a_{cut}[ID[n]] + b_{cut} * Cwidth[n] + c_{cut} * Choice[n]), n = 1, \dots, N_{act}$$

134 The parameters  $a_{cut}[ID[n]]$  are the intercepts for each individual. The  $a_{cut}[k]$  is subjected to the normal  
 135 distribution with the mean  $a_{cut_0}$  and the standard deviation  $a_{cut_s}$ .

$$a_{cut}[k] \sim Normal(a_{cut_0}, a_{cut_s}), k = 1, \dots, N_{animal}$$



136 The prior of  $a_{cut_s}$  is subjected to the half t distribution.

$$a_{cut_s} \sim Student\_t^+(4, 0, 50)$$

137 How much the animal removed the sponge on average  $\lambda[n]$  also can be linked to the linear predictor with the  
138 same terms by the log link function.

$$\log(\lambda_{cut}[n]) = d_{cut}[ID[n]] + e_{cut} * Cwidth[n] + f_{cut} * Choice[n], n = 1, \dots, N_{act}$$

139 The parameters  $d_{cut}[ID[n]]$  is the other intercepts for each individual. The  $d_{cut}[k]$  is subjected to the normal  
140 distribution with the mean  $d_{cut_0}$  and the standard deviation  $d_{cut_s}$ .

$$d_{cut}[k] \sim Normal(d_{cut_0}, d_{cut_s}), k = 1, \dots, N_{animal}$$

141 The prior of  $d_{cut_s}$  is subjected to the half t distribution.

$$d_{cut_s} \sim Student\_t^+(4, 0, 10)$$

142 Altogether, the measured quantity of how much the animal removed the sponge as the response variable  
143  $Removed[n]$  is subjected to the zero-inflated poisson distribution (ZIP) with the parameters  $\phi_{cut}[n]$  and  
144  $\lambda_{cut}[n]$ .

$$Removed[n] \sim ZIP(\phi_{cut}[n], \lambda_{cut}[n]), n = 1, \dots, N_{act}$$

145 When the crab skipped cutting behavior, the  $Removed[n]$  was set to zero even if the sponge size is smaller  
146 than the defined sizes of M or L due to measurement error. Additionally, the  $Removed[n]$  was rounded to  
147 integer to apply this model. The rounding process was judged to have no impact to the data distribution.

#### 148 **cap hole making (model 3\_1)**

149 To examine how the cap hole size  $HoleSize[n]$  is explained by the carapace width  $Cwidth[n]$ , the gamma  
150 distribution was chosen to represent non-negative hole size data. The shape and rate parameters were given  
151 as follows,

$$HoleSize[n] \sim Gamma(shape, shape/exp(a_{hole}[ID[n]] + b_{hole} * Cwidth[n])), n = 1, \dots, N_{act}$$

152 where the rate parameter was given as the shape over the log linked linear predictor. The  $a_{hole}[ID[n]]$  are  
153 the intercepts for each individual. The  $a_{hole}[k]$  is subjected to the normal distribution with the mean  $a_{hole_0}$   
154 and the standard deviation  $a_{hole_s}$ .

$$a_{hole}[k] \sim Normal(a_{hole_0}, a_{hole_s}), k = 1, \dots, N_{animal}$$

#### 155 **time for making (model 4\_1)**

156 We assumed that the time for making until the animal carries the sponge,  $Days[n]$ , which is similar to the  
157 *Removed*[ $n$ ] case, is subjected to the ZIP distribution.

$$\phi_{day}[n] = InverseLogit(a_{day})$$

158

$$\log(\lambda_{day}[n]) = b_{day}[ID[n]] + c_{day} * Cwidth[n]$$

159

$$b_{day}[k] \sim Normal(b_{day_0}, b_{day_s}), k = 1, \dots, N_{animal}$$

160

$$Days[n] \sim ZIP(\phi_{day}[n], \lambda_{day}[n]), n = 1, \dots, N_{act}$$

161 As described above, we also considered the individuality so that the parameters  $b_{day}[ID[n]]$  were incorporated  
162 into this model.

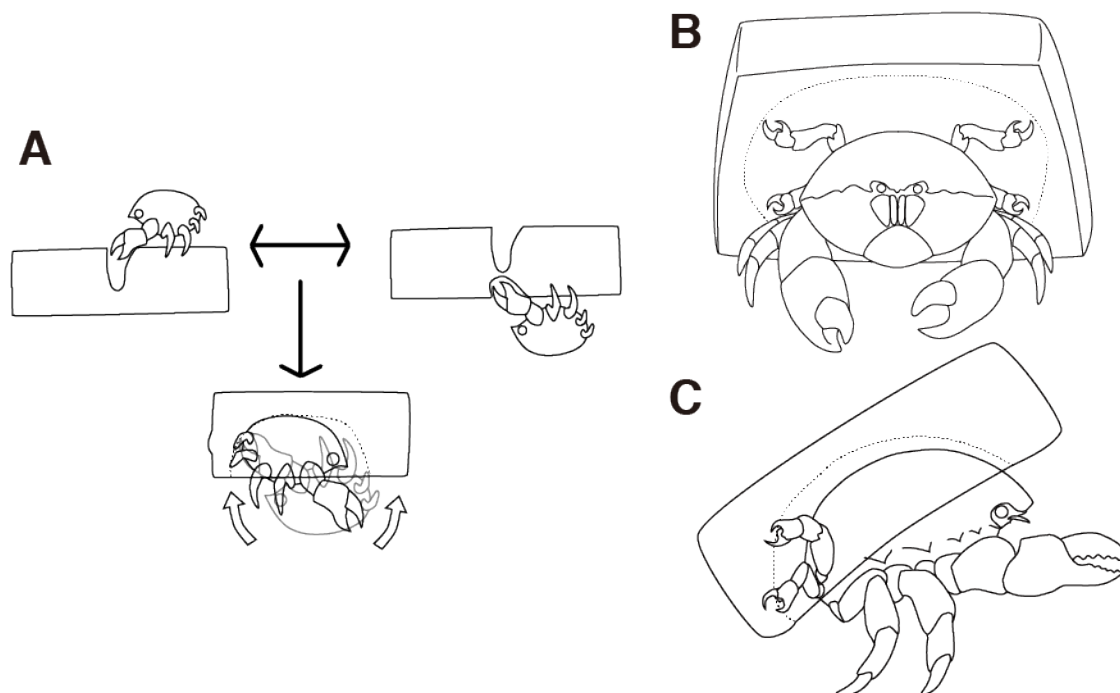

Figure 3: **The cap making behavior consists of cutting to change size of cap, digging to change size of hole, and carrying to extend the body.** (A) The cap making behavior. *L. dehaani* grasps either side of the sponge and tears off small pieces of sponge to make the groove. After cutting the clod of sponge, the crab makes the hole on it. Then the crab rotates their body backward and grasps it by the fourth and fifth pereiopods. It often happened that the crab rotated their body forward and dug it repeatedly to make the hole larger. (B–C) The carrying behavior of the crab. It carries a cap made from an artificial sponge. (B) Frontal view; (C) Right side of the crab; The tips of dactylus of the fourth and fifth pereiopods elongate in opposite directions and grasp the sponge tightly.

## 163 Results

### 164 Cap making behavior

165 The crabs usually made their caps at night. They usually grasped either side of the sponge by the second  
166 and third pereiopods (Fig. 1A). They tore off small pieces of sponge by chelae (Fig. 3A upper left, upper  
167 right, S1). Sometimes they moved to another side of sponge. By repeating these behaviors, the crabs made  
168 the groove to cut off the clod of sponge. After cutting, the crabs made a hole by tearing off small pieces of  
169 sponge (Fig. 3A bottom, S2). It took 14 minutes to dig the hole on average (3 individuals, 7 trials). The  
170 chelae of larger crabs tore off larger pieces of sponge. Then the crabs rotated their body backward in order to  
171 catch it by fourth and fifth pereiopods while they kept the clod grasping by second and third pereiopods.  
172 Finally, the crabs released second and third pereiopods from the cap, and began to carry it (Fig. 3B, C). The

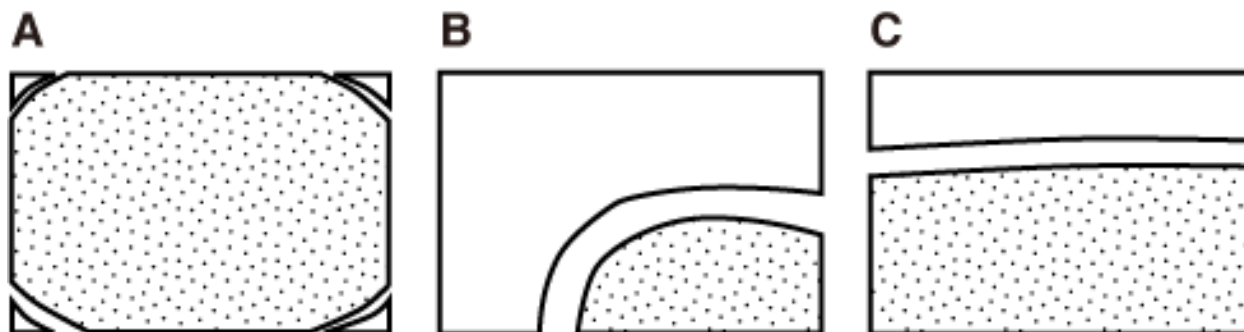

Figure 4: **The patterns of cutting**; (A) cutting the four corners; (B) cutting elliptically; (C) cutting linearly; The crabs carried the dotted area.

173 tip of dactylus of fourth and fifth pereopods elongates in opposite directions each other permitting to grasp  
174 the caps tightly. In the digging behavior, it often happened that they rotated their body forward and dug it  
175 to make the hole larger. They repeated this process up to eleven times per one night and it took up to five  
176 hours. Only one crab stopped the cutting behavior in halfway and changed the position of the sponge to  
177 remove. The other crabs never showed such a trial-and-error behavior in cutting. When the crabs rotated  
178 their body, the direction of the rotation was maintained along with the sponge.

179 On average, it took 50 minutes for the crabs to cut the clod (2 individuals, 10 trials), and almost all the  
180 crabs started digging as soon as they finished cutting. The cut sponge showed three patterns (Fig. 4). They  
181 cut off (1) the four corners of the sponge, (2) one corner of it elliptically, (3) two corners of it linearly. While  
182 the crabs cut the sponge, they actively moved around the sponge. In contrast, they persistently kept under  
183 the sponge during digging to make a hole. Sometimes the crabs did not show the behavior. Only one crab  
184 just cut the sponge and did not dig, 18 crabs skipped cutting in 28 trials, and 5 individuals abandoned the  
185 both of the behaviors in 5 trials.

#### 186 **Cap choice**

187 The behavioral choice of the sponges was better explained by the carapace width (Fig. 5). The larger crabs  
188 tended to choose L size sponge. However, the crabs whose carapace width becomes larger than 9 cm did not  
189 choose the sponges. The parameters  $b_{choice_L}$  and  $e_{choice_0}$  for the carapace width were estimated to be larger  
190 than zero, whereas the  $c_{choice_L}$  and  $f_{choice_0}$  for the degree of leg lack overlapped zero. The percentiles of the  
191 parameters were summarized (Table. 1).

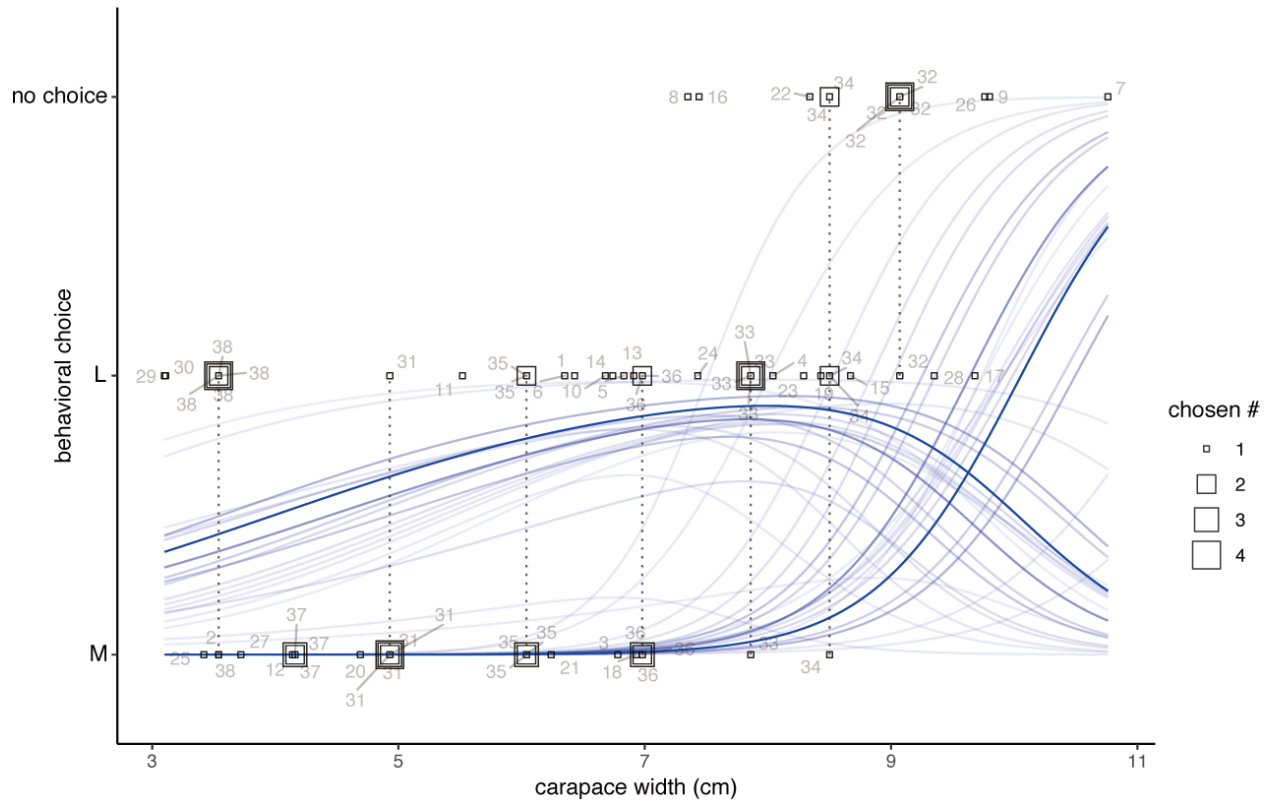

Figure 5: **The larger crabs selected larger sponges, but when the size becomes larger than about 9 cm, they abandoned the choice itself.** The blue lines constructed from ten samples from the posterior distribution of the parameters on the best performed model 1\_1 (Table 1, 2) and represent the probabilities of the choices when compared with the choice of M size sponge. .

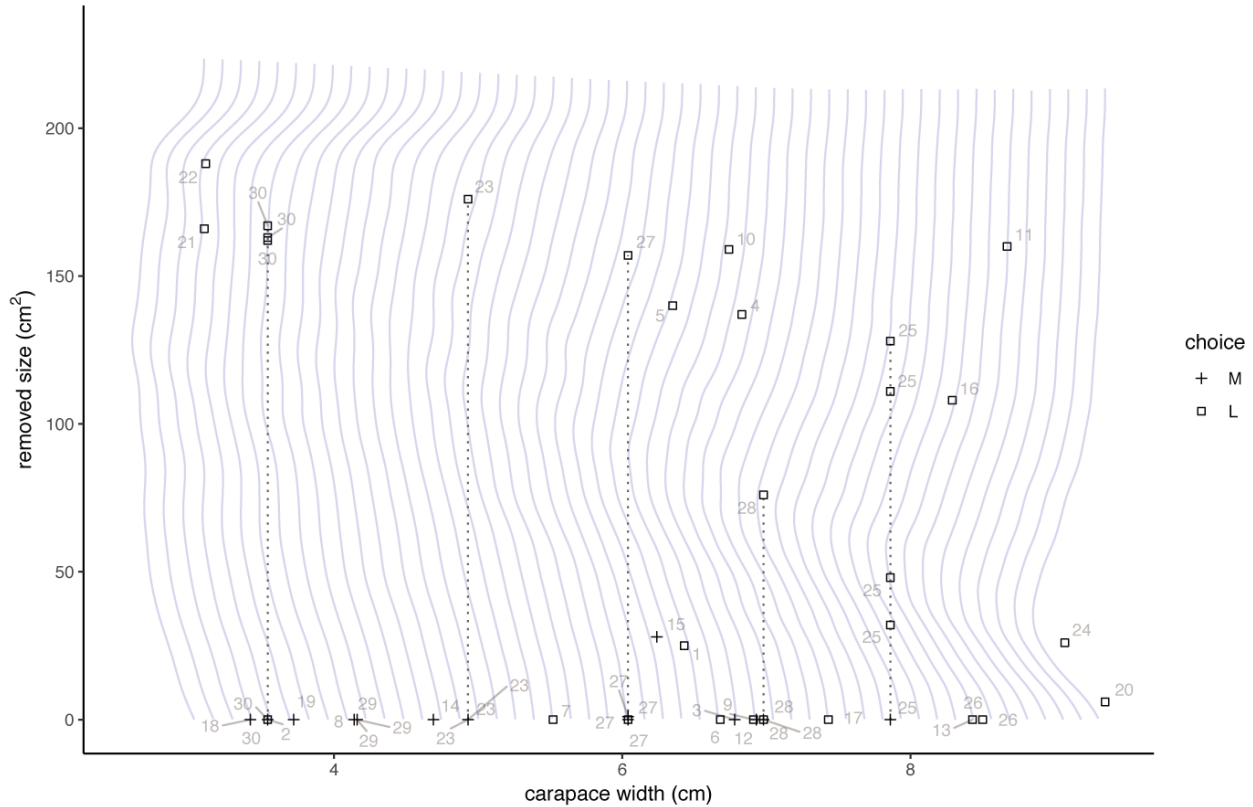

Figure 6: **How much the sponge was removed by cutting by the animals decreases with the carapace width increases.** When the animals choose the M size sponges, almost all of animals decided not to remove the sponge, whereas they removed the sponge in relation to their body sizes when they choose the L size sponges. The dotted lines connect the points from one individual and the labels close to the open squares indicate IDs of the individuals. The blue lines indicate the posterior distribution of the  $\lambda_{cut}$  in the best performed model 2\_1 (Table 1, 2) when the choice is fixed to L size sponge.

## 192 Cutting behavior

193 The cutting behavior showed two paths. One path was that the crabs decided to cut off the sponge and  
194 then decided how much they cut off the sponge. The other path was that they skipped cutting off, then  
195 they started digging. For the first path, the non-zero data points indicating the removed size of the sponge  
196 decreased with the increase of the carapace width. For the second path, the data points are positioned at zero  
197 (Fig. 6). Our statistical analysis showed that the best performed model in terms of WAIC, was the model  
198 including the individuality. The probability to choose performing cutting behavior was neither explained  
199 by the carapace width ( $b_{cut}$  in Table 1), nor the selected sponge ( $c_{cut}$  in Table 1). On the other hand, the  
200 removed size was well explained. The smaller size of crabs tended to remove larger size of sponge to make  
201 caps ( $e_{cut}$  in Table 1). Additionally, the removed size was more remarkably explained by the chosen sponge  
202 size, because the 2.5 percentile of the  $f_{cut}$  was estimated to be larger than zero (Table 1). When the crabs  
203 chose the L size sponge, they tended to choose the first path. On the other hand, when they chose the M size  
204 sponge, in most cases they did not showed the cutting behavior except for only one behavioral act.

## 205 Cap hole and body size

206 Among individuals carrying sponges, we compared the carapace width with the area size of cap hole. The  
207 size increased with the carapace width (Fig. 7). Moreover, the model with the individuality best performed  
208 in the predictability (Table 2). The 2.5 percentile of the parameter  $b_{hole}$  was even larger than zero (Table 1).

## 209 Time for making process

210 There were no obvious relation between the carapace width and the number of days until the crabs carried  
211 the first cap, and a number of crabs had carried the cap by next day. The expected days to carrying was  
212 0.611 on the best performed model (Fig. 8).

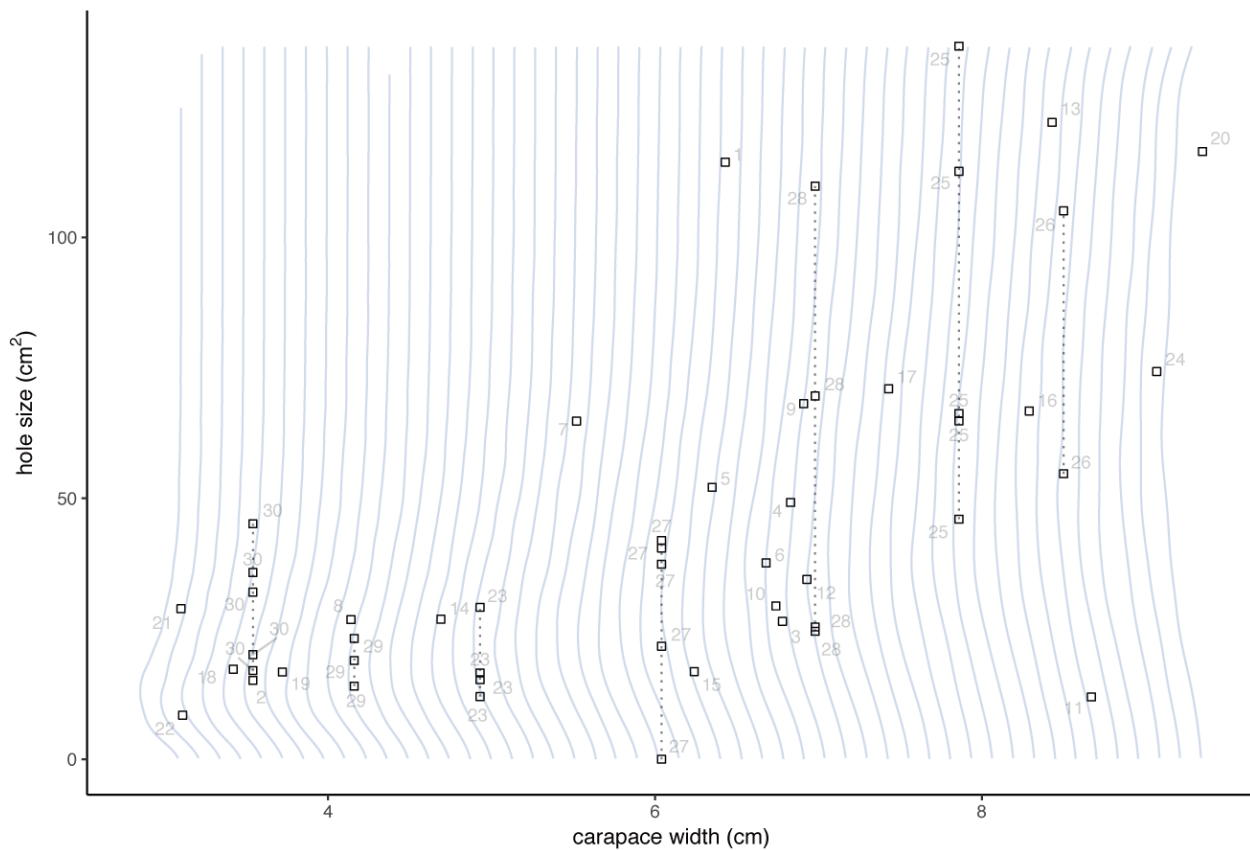

Figure 7: **The larger size of crabs made larger size of holes.** The ID numbers of the individuals are also shown close to the data points. The blue lines are inferred predictive distribution on the best performed model 3\_1 (Table 1, 2). The larger size of crabs made larger size of holes. Additionally, the probabilistic deviation becomes larger when the size of crabs become larger.



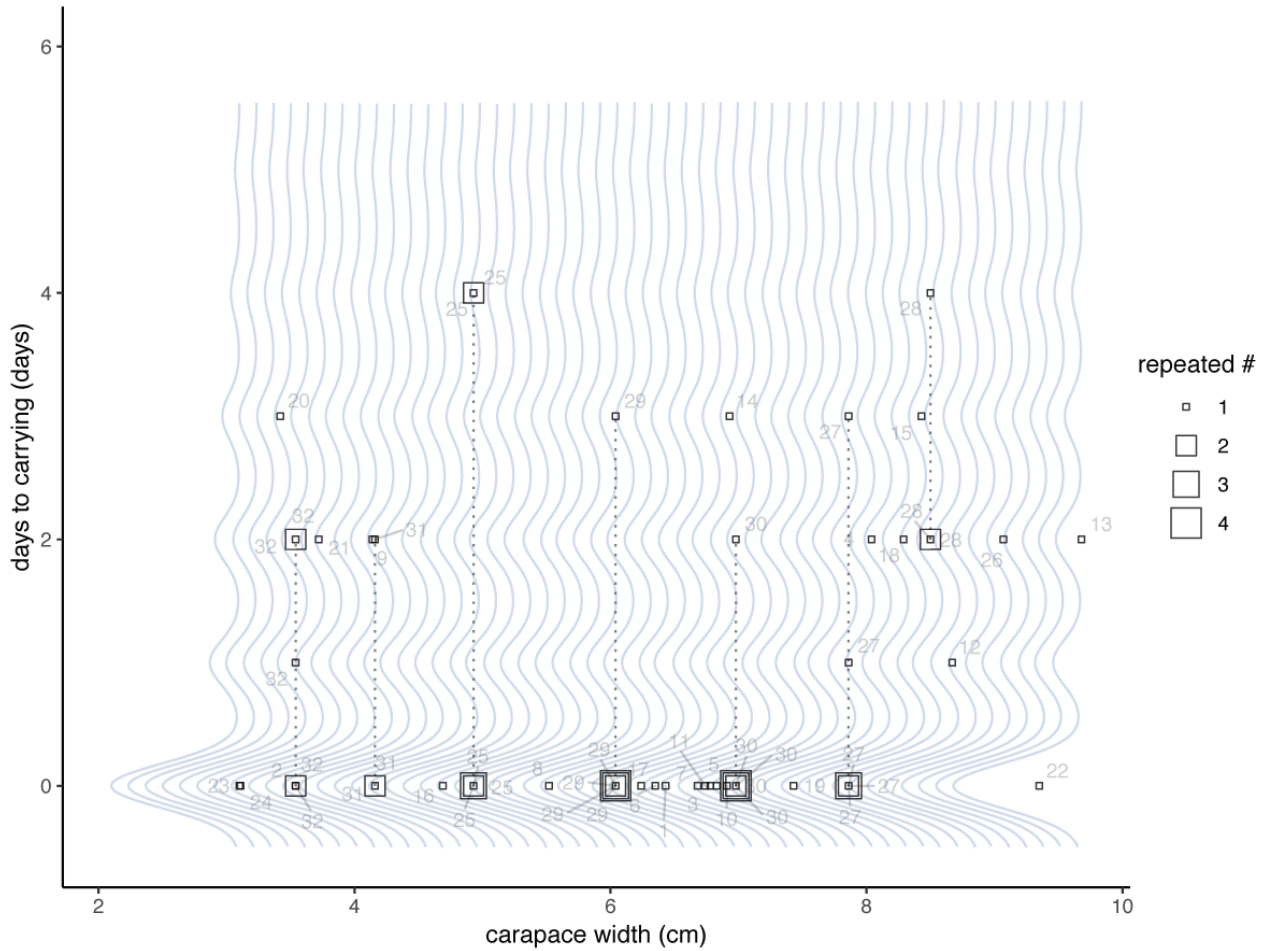

Figure 8: **How many days does it take for the crabs does not change with the carapace width.** The days that the animal took until carrying the sponge as a function of the carapace width are shown with the points and those from the same individual are connected with dotted lines and labels. The model with the carapace width as a explanatory variable was the best performed model. The blue lines represent the predictive distribution on the best performed model 4\_1 (Table 1, 2).

Table 1: **The percentiles from the posterior distributions of the major parameters in the best performed models.**

| behavioral aspects | parameters     | 2.5 percentile | 50 percentile | 97.5 percentile |
|--------------------|----------------|----------------|---------------|-----------------|
| choice             | $b_{choice_L}$ | 0.115          | 0.721         | 1.970           |
|                    | $c_{choice_L}$ | -3.11          | -0.264        | 1.914           |
|                    | $e_{choice_0}$ | 1.233          | 2.467         | 4.885           |
|                    | $f_{choice_0}$ | -1.909         | 0.306         | 2.329           |
| cutting            | $b_{cut}$      | -1.998         | 0.063         | 3.107           |
|                    | $c_{cut}$      | -27.64         | -0.894        | 6.896           |
|                    | $e_{cut}$      | -0.645         | -0.212        | 0.280           |
|                    | $f_{cut}$      | 3.391          | 6.270         | 8.625           |
| hole making        | $b_{hole}$     | 0.168          | 0.273         | 0.378           |
| days to carrying   | $c_{day}$      | -0.151         | 0.010         | 0.173           |

**Table 2: Models and their predictive performances quantified by WAIC.** Abbreviations used in the table are as following: intercept\_L— intercept in the linear predictor (LP) for the choice of L; intercept\_1(cutting section)—intercept in the LP for the decision of cutting; intercept\_2(cutting section)—intercept in the LP for the mean of the removed size of the sponge; cw—slope in the LP for the carapace width; CW—carapace width; Leg—degree of the leg lack; \_L and \_NO—parameters for L sponge and no choice, respectively; Choice (cutting section)—choice whether to cut the sponge; Gender— gender of the animal; intercept\_2 (days to carrying section)—intercept in the LP for the mean of the days to carrying; Choice (days to carrying section)—choice of sponge size.

| response<br>variable | individual |                             |                               | link       |              | WAIC  |
|----------------------|------------|-----------------------------|-------------------------------|------------|--------------|-------|
|                      | model      | difference                  | explanatory variables         | function   | distribution |       |
| choice               | 1_1        | intercept_L                 | CW_L, Leg_L,<br>CW_NO, Leg_NO | softmax    | categorical  | -2.01 |
|                      | 1_2        | intercept_L                 | CW_L, CW_NO                   | softmax    | categorical  | -1.87 |
|                      | 1_3        | intercept_L                 | -                             | softmax    | categorical  | -0.88 |
|                      | 1_4        | intercept_L                 | Leg_L, Leg_NO                 | softmax    | categorical  | -0.78 |
|                      | 1_5        | -                           | CW_L, CW_NO                   | softmax    | categorical  | 0.85  |
|                      | 1_6        | -                           | CW_L, Leg_L,<br>CW_NO, Leg_NO | softmax    | categorical  | 0.88  |
| cutting              | 2_1        | intercept_1,<br>intercept_2 | CW, Choice                    | logit, log | ZIP          | -1.91 |
|                      | 2_2        | intercept_2                 | CW, Choice                    | logit, log | ZIP          | 0.88  |
|                      | 2_3        | intercept_2                 | Choice                        | logit, log | ZIP          | 0.99  |
|                      | 2_4        | intercept_2                 | -                             | logit, log | ZIP          | 1.24  |
|                      | 2_5        | intercept_2                 | CW                            | logit, log | ZIP          | 1.37  |
|                      | 2_6        | -                           | CW, Choice                    | logit, log | ZIP          | 7.40  |
|                      | 2_7        | -                           | CW                            | logit, log | ZIP          | 10.04 |

| response         | individual |               |                       | link       |              |       |
|------------------|------------|---------------|-----------------------|------------|--------------|-------|
| variable         | model      | difference    | explanatory variables | function   | distribution | WAIC  |
|                  | 2_8        | -             | -                     | logit, log | ZIP          | 12.53 |
| hole making      | 3_1        | intercept     | CW                    | log        | gamma        | 4.34  |
|                  | 3_2        | -             | CW                    | log        | gamma        | 4.54  |
|                  | 3_3        | -             | CW, Gender            | log        | gamma        | 4.69  |
|                  | 3_4        | intercept     | -                     | log        | gamma        | 4.71  |
|                  | 3_5        | -             | CW                    | identity   | normal       | 4.75  |
|                  | 3_6        | intercept, cw | CW                    | log        | gamma        | 6.43  |
| days to carrying | 4_1        | intercept_2   | CW                    | logit, log | ZIP          | 0.99  |
|                  | 4_2        | intercept_2   | -                     | logit, log | ZIP          | 1.05  |
|                  | 4_3        | -             | -                     | logit, log | ZIP          | 1.28  |
|                  | 4_4        | -             | Choice                | logit, log | ZIP          | 1.28  |
|                  | 4_5        | -             | CW                    | logit, log | ZIP          | 1.30  |
|                  | 4_6        | -             | CW, Choice            | logit, log | ZIP          | 1.38  |

## 213 Discussion

### 214 Functional role of cap

215 It is expected that the crabs extending their body in order to camouflage and defend themselves (Dembowska,  
216 1926; McLay, 1983; Bedini et al., 2003) with repellent effect of the sponge (e.g. Cariello and Zanetti, 1979).  
217 In particular, some homolid crabs are reported to carry not only sponges or ascidians but also sea anemones  
218 (Chintiroglou et al., 1996), and they drive away their predators with these materials (Braga-Henriques et al.,  
219 2011). As Bedini et al. (2003) expected, the main impulse of camouflaging crabs is to cover themselves even  
220 if the materials do not contain certain repellent chemicals. Similarly, the crabs in this study would carry  
221 caps to hide their body with top priority. One individual lacking third, fourth, and fifth pereopods of the  
222 right side even carried the cap once during five trials. The crabs may prefer toxic materials, but no materials  
223 with the toxic chemicals available in this study. It is observed that sponge crabs carry not only sponges or  
224 ascidians but also sea anemones (Lavaleye and den Hartog, 1995) or lamellibranch shells (Wicksten, 1986),  
225 and it should be noted that *L. dehaani* in Shirahama aquarium sometimes carries not a few materials such as  
226 alcyonacean corals of the families Nephtheidae and Acanthogorgiidae or the cephalothorax of the exuvium of  
227 slipper lobster (*Scyllarides squamosus*).

228 Many similarities were observed in the cap making behavior of *L. dehaani* with other crabs such as *D.*  
229 *personata* and *C. hilgendorfi* (Dembowska, 1926; McLay, 1983). The crabs *C. hilgendorfi* make the caps  
230 usually during the night, and McLay (1983) expected that this is because making caps at night is probably  
231 less risky. It is likely that *L. dehaani* make caps at night for the same reason. From the video recordings we  
232 described all of the cap making behavioral sequence (Fig. 3), and the sponge crabs were found to process  
233 both natural sponges and artificial sponges in a similar way. However, in *C. hilgendorfi* it took 30 to 45  
234 minutes for making and donning (McLay, 1983), but *L. dehaani* took longer times for making (50 minutes).  
235 In contrast to the case of *C. hilgendorfi*, *L. dehaani* repeated digging behavior up to eleven times, suggesting  
236 that there might be species specificity in the making time. In the larger time scales, there was no clear  
237 positive correlation between the size of crabs and the days to make caps (Fig. 8, Table 1). Dembowska (1926)  
238 qualitatively reported that the younger *D. personata* make caps earlier than old individuals. We counted the  
239 days the crabs took to make caps, but the time resolution would be too large to detect the correlation. Further  
240 study measuring the time with less time resolution such as minutes to hours might detect the correlation.  
241 Additionally, further controlled experiments for testing the time and the risk sensitivity will be required.

## 242 **Making cost and size choice: why the crab abandoned carrying sponge?**

243 There are not so many marine animals showing the decorating behavior, because this behavior would compel  
244 the animal to pay the energetic cost (Berke and Woodin, 2008). For example, the adult males of *Oregonia*  
245 *gracilis* tended to decorate less than the juveniles or adult females, and this would be because the energetic  
246 cost of the adult males to maintain their large claws increases and they could not pay the cost for decorating.  
247 In this experiment, the size of the crabs that did not carry caps was larger than that carried caps (Fig. 5).  
248 When they grow up to some extent, the number of predators for them would be limited and the energetic  
249 cost to make caps might increase so that larger individuals would not make the caps.

250 Another possibility for why the crabs abandoned carrying sponge is that the sponges used in this experiment  
251 were smaller than those of necessary size for the crabs. Dembowska (1926) reported that the proportion  
252 of caps to the size of *D. personata* tended to decrease with the size of the crabs, and considered that this  
253 was because there were few sponges fitting to the large crabs. Similarly, the large crabs that abandoned the  
254 choice itself, would carry the cap if the sponge size would be larger than the L size sponge. In contrast, there  
255 were no individuals that carried the S sponge in this study. This may be because it was too small for all  
256 of the crabs to carry. It is likely that the crabs younger and smaller than those we used in this experiment  
257 would carry the S sponge.

258 The degree of lack of carrying legs is considered not to decrease the probability of sponge choice, because the  
259 posterior distribution of the parameter  $f_{choice_0}$  largely overlaps zero (Table 1). This might support that the  
260 advantages of carrying sponge overcome the disadvantages even if they lack the legs for carrying.

## 261 **Assimilated extended body**

262 To make the living or non-living materials suitable to the animal body design, the animals choose and  
263 sometimes customize the material. Hermit crabs are well known to prefer specific shells (Bertness, 1980;  
264 Hazlett, 1981; Wilber, 1990). Although hermit crabs can not modify the shells by themselves, for example,  
265 the terrestrial hermit crabs, *Coenobita rugosus*, are suggested to recognize and learn the shape of extended  
266 shells and the surrounding terrain. When the experimenter attached a plastic plate to change the shell size,  
267 the hermit crabs adapted to the new shell by swiftly changing their walking behavior (Sonoda et al., 2012).  
268 In our study, we demonstrated that not only the crabs chose the size of sponges (Fig. 5), but also they cut  
269 off the suitable size of sponge (Fig. 6) and made the suitable size of hole in the sponge (Fig. 7).

270 Moreover, in either case of the statistical models, the models including the individuality outperformed the

271 other models without it in terms of the model predictability. In order to control the quality and size of the  
272 sponges, we used artificial sponges in this experiment. Although the sponge was artificial, they have the great  
273 potential of making caps fitting to their own body. We finished the trial when the crab carried the cap, but  
274 sometimes observed the individuals showing modification by digging after they carry caps. Hence, it is likely  
275 that if we continue recording, the animals will be able to obtain more suitable sponge caps.

276 Among vertebrates, the primates such as chimpanzees and gorillas (e.g. Boesch and Boesch, 1990; Breuer et  
277 al., 2005) and the birds such as crows (Hunt, 1996; Matsui and Izawa, 2017) have been studied as tool users.  
278 On the other hand, among invertebrates, it is known that octopuses use coconuts as defensive tools (Finn  
279 et al., 2009) and insects, for instance bumblebees, are able to perform the task in which they have to use  
280 surrounding materials (Loukola, et al., 2017). Some crustacean, such as green crabs and American lobster are  
281 able to perform instrumental conditioning (Abramson and Feinman, 1990; Tomina and Takahata, 2010). Our  
282 findings demonstrated that the crabs can update the cap size depending on the current body size during  
283 inter-molt period. It is observed that the sponge crab repeatedly modified the cap to fit it to their body.  
284 Therefore, the crabs have a potential to learn to know the body size and perform the cap making behavior.  
285 Additionally, it is probable that the crabs also take advantages of the shape and the size of the body itself as  
286 a guide. Almost all of the cutting behavior did not include the trial-and-error process, suggesting that some  
287 topdown mechanisms might underlie the behavior. Further behavioral and neurophysiological experiments  
288 can clarify how they recognize their own body design such as size and shape, and how the information is  
289 integrated into making embodied cap.

## 290 **Supplementary information**

291 The movie of cutting and digging behaviors were attached as supplementary movies.

292 All the source codes and data are available from a gist repository, [https://gist.github.com/kagaya/  
293 3188dd0a4571b068e501aeef9863e255](https://gist.github.com/kagaya/3188dd0a4571b068e501aeef9863e255).

## 294 **Acknowledgements**

295 We thank the Shirahama aquarium for use of the aquarium tanks, and the Sakai fishing port for the offers of  
296 the crabs.

## 297 **Competing interest**

298 We have no competing interest.

## 299 **Authors' contributions**

300 Keita Harada conceived the experimental design and performed the experiments. Katsushi Kagaya performed  
301 statistical modeling. KH and KK wrote the paper.

## 302 **References**

- 303 Abramson, C. I., & Feinman, R. D. (1990).  
304 Lever-press conditioning in the crab. *Physiology & Behavior*, *48*(2), 267–272.
- 305 Bedini, R., Canali, M. G., & Bedini, A. (2003).  
306 Use of camouflaging materials in some brachyuran crabs of the Mediterranean infralittoral zone. *Cahiers De*  
307 *Biologie Marine*.
- 308 Berke, S. K., & Woodin, S. A. (2008).  
309 Energetic costs, ontogenetic shifts and sexual dimorphism in spider crab decoration. *Functional Ecology*,  
310 *22*(6), 1125–1133. <http://doi.org/10.1111/j.1365-2435.2008.01469.x>
- 311 Bertness, M. D. (1980).  
312 Shell preference and utilization patterns in littoral hermit crabs of the bay of Panama. *Journal of Experimental*  
313 *Marine Biology and Ecology*, *48*(1), 1–16. [http://doi.org/10.1016/0022-0981\(80\)90002-7](http://doi.org/10.1016/0022-0981(80)90002-7)
- 314 Boesch, C., & Boesch, H. (1990).  
315 Tool use and tool making in wild chimpanzees. *Folia Primatologica; International Journal of Primatology*,  
316 *54*(1-2), 86–99. <http://doi.org/10.1159/000156428>
- 317 Braga-Henriques, A., Carreiro-Silva, M., Tempera, F., Porteiro, F. M., Jakobsen, K., Jakobsen, J., et al.  
318 (2011).  
319 Carrying behavior in the deep-sea crab *Paromola cuvieri*. *Marine Biodiversity*, *42*(1), 37–46. [http://doi.org/](http://doi.org/10.1007/s12526-011-0090-3)  
320 [10.1007/s12526-011-0090-3](http://doi.org/10.1007/s12526-011-0090-3)
- 321 Breuer, T., Ndoundou-Hockemba, M., & Fishlock, V. (2005).  
322 First Observation of Tool Use in Wild Gorillas. *PLoS Biology*, *3*(11), e380–3. [http://doi.org/10.1371/journal.](http://doi.org/10.1371/journal.pbio.0030380)  
323 [pbio.0030380](http://doi.org/10.1371/journal.pbio.0030380)



- 324 Blanke, O., & Metzinger, T. (2009).  
325 Full-body illusions and minimal phenomenal selfhood. *Trends in Cognitive Sciences*, 13(1), 7–13. <http://doi.org/10.1016/j.tics.2008.10.003>  
326
- 327 Capezzuto, F., Maiorano, P., Panza, M., Indennitate, A., Sion, L., & D’Onghia, G. (2012).  
328 Occurrence and behaviour of *Paromola cuvieri* (Crustacea, Decapoda) in the Santa Maria di Leuca cold-water  
329 coral community (Mediterranean Sea). *Deep Sea Research Part I: Oceanographic Research Papers*, 59, 1–7.  
330 <http://doi.org/10.1016/j.dsr.2011.10.006>
- 331 Cariello, L., & Zanetti, L. (1979).  
332 Suberitine, the toxic protein from the marine sponge, *Suberites domuncula*. *Comparative Biochemistry and*  
333 *Physiology Part C: Comparative Pharmacology*, 64(1), 15–19. [http://doi.org/10.1016/0306-4492\(79\)90023-6](http://doi.org/10.1016/0306-4492(79)90023-6)
- 334 Chintiroglou, C. C., Doumenc, D., & Guinot, D. (1996).  
335 Anemone-Carrying Behaviour in a Deep-Water Homolid Crab (Brachyura, Podotremata). *Crustaceana*, 69(1),  
336 19–25. <http://doi.org/10.1163/156854096X00024>
- 337 De Carvalho, F., Rodrigues, R. O., Barreto, R. E. & Costa, T. N. (2016).  
338 Decoration behaviour in a spider crab, *Acanthonyx scutiformis* (Dana, 1851) in relation to life stage, sex and  
339 algal species. <http://doi.org/10.1163/15685403-00003539>
- 340 Dembowska, W. S. (1926).  
341 Study on the Habits of the Crab *Dromia vulgaris* ME. *The Biological Bulletin*.
- 342 Finn, J. K., Tregenza, T., & Norman, M. D. (2009).  
343 Defensive tool use in a coconut-carrying octopus. *Current Biology*, 19(23), R1069–R1070. <http://doi.org/10.1016/j.cub.2009.10.052>  
344
- 345 Gelman, A., & Rubin, D. B. (1992).  
346 Inference from Iterative Simulation Using Multiple Sequences. *Statistical Science*, 7(4), 457–472. <http://doi.org/10.1214/ss/1177011136>  
347
- 348 Hazlett, B. A. (1981).  
349 The Behavioral Ecology of Hermit Crabs. *Annual Review of Ecology and Systematics*, 12(1), 1–22. <http://doi.org/10.1146/annurev.es.12.110181.000245>  
350
- 351 Hunt, G. R. (1996).  
352 Manufacture and use of hook-tools by New Caledonian crows. *Nature*, 379(6562), 249–251. <http://doi.org/10.1038/379249a0>  
353

- 354 Lavaleye, M. S. S., & den Hartog, J. C. (1995).  
355 A case of associated occurrence of the crab *Lauridromia inter-media* (Laurie, 1906) (Crustacea: Decapoda:  
356 Dromiidae) and the actinian *Nemanthus annamensis* Carlgren, 1943 (Anthozoa: Actiniaria: Nemanthidae).  
357 *Zool. Med. Leiden*, 69.
- 358 Loukola, O. J., Perry, C. J., Coscos, L., & Chittka, L. (2017).  
359 Bumblebees show cognitive flexibility by improving on an observed complex behavior. *Science (New York,*  
360 *NY)*, 355(6327), 833–836. <http://doi.org/10.1126/science.aag2360>
- 361 Maldonado, M., & Uriz, M. J. (1992).  
362 Relationships between sponges and crabs: patterns of epibiosis on *Inachus aguiarii* (Decapoda: Majidae).  
363 *Marine Biology*, 113(2), 281–286. <http://doi.org/10.1007/BF00347282>
- 364 Matsui, H., Izawa, E. (2017). Flexible motor adjustment of pecking with an artificially extended bill in crows  
365 but not in pigeons. *Royal Society open science*, 4(2), 160796. <https://doi.org/10.1098/rsos.160796>
- 366 Matsuura, K. (2016). Bayesian Statistical Modeling Using Stan and R. Kyoritsu Shuppan Co., Ltd.
- 367 McLay, C. L. (1983).  
368 Dispersal and use of sponges and ascidians as camouflage by *Cryptodromia hilgendorfi* (Brachyura: Dromiacea).  
369 *Marine Biology*, 76(1), 17–32. <http://doi.org/10.1007/BF00393051>
- 370 R Core Team. (2018).  
371 R: A Language and Environment for Statistical Computing. <https://www.R-project.org>
- 372 Sonoda, K., Asakura, A., Minoura, M., Elwood, R. W., & Gunji, Y.-P. (2012).  
373 Hermit crabs perceive the extent of their virtual bodies. *Biology Letters*, 20(1), rsbl20120085–93. <http://doi.org/10.1098/rsbl.2012.0085>  
374
- 375 Stan Development Team. (2017).  
376 *Stan Modeling Language Users Guide and Reference Manual*, Version 2.17.0. <http://mc-stan.org>
- 377 Thanh, P. D., Wada, K., Sato, M., & Shirayama, Y. (2005).  
378 Effects of resource availability, predators, conspecifics and heterospecifics on decorating behaviour by the  
379 majid crab *Tiarinia cornigera*. *Marine Biology*, 147(5), 1191–1199. <http://doi.org/10.1007/s00227-005-0017-2>
- 380 Tomina, Y., & Takahata, M. (2010).  
381 A behavioral analysis of force-controlled operant tasks in American lobster. *Physiology & Behavior*, 101(1),  
382 108–116. <http://doi.org/10.1016/j.physbeh.2010.04.023>

- 383 Watanabe, S. (2010).  
384 Asymptotic Equivalence of Bayes Cross Validation and Widely Applicable Information Criterion in Singular  
385 Learning Theory. *Journal of Machine Learning Research*, 11(Dec), 3571–3594.
- 386 Watanabe, S. (2018).  
387 Mathematical theory of Bayesian statistics. *CRC Press*, FL
- 388 Wicksten, M. K. (1985).  
389 Carrying Behavior in the Family Homolidae (Decapoda: Brachyura). *Journal of Crustacean Biology*, 5(3),  
390 476–479. <http://doi.org/10.2307/1547919>
- 391 Wicksten, M. K. (1986).  
392 Shell-Carrying in *Hypoconcha Sabulosa* (Herbst, 1799) (Decapoda, Brachyura). *Crustaceana*, 50(3), 319–320.  
393 <http://doi.org/10.1163/156854086X00340>
- 394 Wicksten, M. K. (1993).  
395 A Review and a Model of Decorating Behavior in Spider Crabs (Decapoda, Brachyura, Majidae). *Crustaceana*,  
396 64(3), 314–325. <http://doi.org/10.1163/156854093X00667>
- 397 Wilber, T. P. (1990).  
398 Influence of size, species and damage on shell selection by the hermit crab *Pagurus longicarpus*. *Marine*  
399 *Biology*, 104(1), 31–39. <http://doi.org/10.1007/BF01313154>
- 400 Wilby, D., Riches, S., Daly, I. M., Bird, A., Wheelwright, M., & Foster, J. J. (2018).  
401 Hermit crabs ( *Pagurus bernhardus*) use visual contrast in self-assessment of camouflage. *The Journal of*  
402 *Experimental Biology*, 221(13), jeb173831–5. <http://doi.org/10.1242/jeb.173831>
