# 1 Individuality emerging in cap making by 2 sponge crab

3 Keita Harada<sup>1</sup> and Katsushi Kagaya<sup>2</sup>

4 <sup>1</sup>Seto Marine Biological Laboratory, Field Science, Education and Reseach Center,  
5 Kyoto University, Shirahama-cho, Nishimuro-gun, Wakayama 649-2211 Japan

6 <sup>2</sup>The Hakubi Center for Advanced Research, Kyoto University, Yoshida-Konoe-cho,  
7 Sakyo-ku, Kyoto 606-8501, Japan

8 Corresponding author:

9 Katsushi Kagaya<sup>1</sup>

10 Email address: [kagaya.katsushi.8e@kyoto-u.ac.jp](mailto:kagaya.katsushi.8e@kyoto-u.ac.jp)

## 11 ABSTRACT

12 To get camouflage successful, an animal and camouflage as a body-part need to be integrated into the  
13 environment. When an individual grows, the camouflage is usually modified to maintain integrity. How  
14 does the animal maintain the whole body-camouflage system as an individual? We studied the cap  
15 making behavior of the sponge crab, *Lauridromia dehaani* that can carry an artificial sponge as a cap.  
16 We obtained the behavioral data including repeated samples from the same individual. The multilevel  
17 or hierarchical models are often used to deal with the clustered data. However, the evaluation of the  
18 appropriateness of the hierarchical model is a challenge in statistical modeling. This is because the  
19 hierarchical model is a statistically non-regular model. Here, we apply marginal-level WAIC (Widely  
20 Applicable Information Criterion) to assess the appropriateness of the assumption of the hierarchical  
21 structure. We found that the hierarchical models remarkably outperformed non-hierarchical ones in  
22 decision making of material size and cap making by the crab, although the performance improvements of  
23 the models were small for cap hole making. Our analyses revealed that not only large individuals tend to  
24 choose and shape large caps, but also the individual-specific bias emerges in the behavior.

## 25 INTRODUCTION

26 Animals sometimes use environmental materials to camouflage themselves in their environment [Blanke  
27 and Metzinger (2009), Sonoda et al. (2012), Guinot and Wicksten (2015), Wilby et al. (2018)]. When  
28 the material becomes not appropriate for some reason, for example, because of growth, animals usually  
29 make them suitable to maintain the integrity of the body and camouflage. In other words, the body and  
30 camouflage would have some uniqueness as a united individual. How can we measure the appropriateness  
31 of the assumption of the 'individual' in their behavior? We propose a statistical formulation of how to  
32 capture the individuality from the behavioral data. To capture the structure in the clustered data so far,  
33 the class of statistical models with hierarchical structure is often used [Galbraith et al. (2010)]. The data  
34 is sometimes called 'pseudo-replicated' because of the violation of the assumption of independent and  
35 identical distribution under the non-hierarchical models [Reinhart (2015)]. The problem can be dealt with  
36 appropriately if we explicitly introduce a hierarchical structure into the model such as linear mixed or  
37 generalized linear mixed models [Zuur et al. (2009), Kagaya and Patek (2016)]. However, it has been a  
38 challenge to assess the appropriateness of the models because they are non-regular models [Watanabe  
39 (2018), Millar (2018)]. In order to infer the true probability distribution using regular models, the  
40 maximum likelihood-based framework of the model selection using AIC (Akaike Information Criterion)  
41 has been traditionally used [Akaike (1974), Sakamoto et al. (1986)]. However, for the non-regular models,  
42 one can not approximate the posterior distribution by any normal distribution, so one needs a fully  
43 Bayesian approach and WAIC (Widely Applicable Information Criterion) [Watanabe (2010b), Watanabe  
44 (2010a)]. WAIC can be used for non-regular, non-identifiable, non-realizable models under the identical  
45 and independent distribution [Watanabe (2018)]. Additionally, not only we need the approach, but also we  
46 must be careful about how to compute WAIC. It is strongly recommended to compute the marginal-level

47 WAIC which is consistently applicable to the hierarchical and non-hierarchical models instead of typically  
48 used conditioned-level WAIC [Millar (2018)]. We took the approach to examine whether the 'individual'  
49 specified as hierarchical structure exists in the cap making behavior of marine sponge crabs who make  
50 caps or hats for 'concealment strategy' [Guinot and Wicksten (2015)].

51 To conceal themselves in their environment, some brachyuran are known to carry and decorate  
52 materials such as Porifera, Ascidiacea, sea anemone, shell, or algae [Guinot et al. (1995), Guinot and  
53 Wicksten (2015)]. The majid crabs decorate themselves with some sponges and algae [Maldonado and  
54 Uriz (1992), Wicksten (1993), Bedini et al. (2003), Berke and Woodin (2008b), De Carvalho et al. (2016)].  
55 Crabs of the family Dromiidae [Dembowska (1926), McLay (1983), Bedini et al. (2003)], Homolidae  
56 [Wicksten (1983), Wicksten (1985), Wicksten (1986a), Braga-Henriques et al. (2012), Capezzuto et al.  
57 (2012), Guinot et al. (2013), Guinot and Wicksten (2015)], and Dorippidae [Wicksten (1986a), Bedini  
58 et al. (2003), Guinot et al. (2013)] are reported to carry sponges and ascidians. It is suggested that these  
59 behaviors are mainly camouflage and defense to predators [Wicksten (1986a), Wicksten (1986b), Thanh  
60 et al. (2005), Guinot and Wicksten (2015)]. In particular, the toxic character of sponges is more effective  
61 to protect crabs against the attacks of predators [Bedini et al. (2003)].

62 Among these crabs, dromiids can detach sponges or ascidians from the substrate and make caps  
63 [Dembowska (1926), McLay (1982), McLay (1983), McLay (1991), McLay (1993), McLay (2001b),  
64 McLay (2001a), McLay (2001c), McLay (2002), McLay (2009), Wicksten (1986a), Lavaleye and  
65 Den Hartog (1995), Guinot et al. (2013), Guinot and Wicksten (2015)]. The cap has a concave surface on  
66 the bottom, and the dromid crabs put it on to their back. Sponge crabs have a fixed spine on the propodus  
67 of the fourth and fifth pairs of the pereopods and the dactylus can move opposite direction, so they can  
68 use the legs just like chelae to grasp and stretch the cap (Fig. 1A) [Guinot et al. (2013), Guinot and  
69 Wicksten (2015)]. In the field research, one study dealt with the preference of dromiids to materials for  
70 caps and the correspondence of the size of cap to the size of the crab [McLay (1983)]. It is reported that  
71 *Cryptodromia hilgendorfi* use the caps made by many species of sponges, but they particularly prefer the  
72 sponge *Suberites carnosus*, and the crabs make sponge caps twice as large as the carapace area. In the  
73 experimental research, the preference to the size of material and the suitability between the size of crabs  
74 and the caps are scarcely investigated. Dembowska [Dembowska (1926)] reported qualitatively that the  
75 size of caps made by *Dromia personata* (reported as *D. vulgaris*) with paper is as large as the size of  
76 those that the crabs originally carried. *Dromia personata* mainly uses sponges and ascidians [Bedini et al.  
77 (2003)], while they can also make caps with paper [Dembowska (1926)]. However, it should be noted that  
78 these studies have not dealt with the problem raised in this study, because the samples for analyses are  
79 dataset consisting of one observation from one individual.

80 In this study, we studied a species of sponge crab: *Lauridromia dehaani* and examined the individuality  
81 of their cap making behavior consisting of sponge size choice, sponge removing, hole making. To sample  
82 repeated observations from one individual, we repeatedly gave three different sizes of artificial sponges.  
83 Our goals of this study are two holds. First, we aim to introduce the hierarchical structure into statistical  
84 models. Second, we aim to assess the appropriateness of the assumption by comparing non-hierarchical  
85 competing alternative models using marginal-level WAIC.

## 86 METHODS

### 87 Animal collection

88 From December 2015 to April 2017, 40 individuals (21 males, 19 females) of *Lauridromia dehaani*  
89 (Brachyura: Dromiidae) were obtained from the Sakai fishing port, Minabe town, Wakayama, Japan (33°  
90 44'N, 135° 20'E). We conducted the experiments for 38 individuals (20 males, 18 females) and video  
91 recorded for 2 individuals (4.30 cm and 7.19 cm of the carapace width for each) in the tanks at Shirahama  
92 Aquarium, Seto Marine Biological Laboratory, Kyoto University (33° 41'N, 135° 20'E), from December  
93 2015 to June 2017. Before the experiments, all individuals were maintained in the tanks (19.5–23.8 °C) of  
94 the aquarium more than two days to make them get used to the environment. We measured the carapace  
95 width of them (Fig. 1B), and the individuals were divided into five classes whether they lacked any of the  
96 fourth and fifth pereopods: (A) only one of them was absent, (B) either of both side were absent, (C) both  
97 of the fourth and fifth of each side were absent, (D) more than three were absent, (O) none of the fourth  
98 and fifth pereopods were absent. In this study, the specimens that classed B or D were not collected so  
99 that we just used the categories, A, C, and O.

## 100 **Experimental setup and procedure**

101 We cut the melamine sponge into three classes of size (S: 20 mm x 30 mm x 40 mm, M: 30 mm x 60 mm  
102 x 85 mm, L: 30 mm x 140 mm x 150 mm). Each sponge was put pseudo-randomly to either sides and the  
103 center behind of the cage (700 mm x 470 mm x 190 mm, Fig. 1C), which floated in the tank. Then, crabs  
104 were introduced to the front center of the cage, thereby the distance between each sponge and the crab  
105 was equal.

106 We checked whether the crab carried any sponge once a day in the morning. If it did, we collected the  
107 sponge, otherwise, the crab and the three sponges remained in the cage. When the crab did not carry any  
108 sponge for five days, we stopped the experiment. First, we performed one trial for one individual ( $n = 30$ ),  
109 but five trials for one individual after February 2017 ( $n = 8$ ) to examine the individuality of the behavior.  
110 We thoroughly desiccated all the sponges that the crabs processed, measured the whole area of them, and  
111 the area of the hole by taking pictures from 46 cm above the sponges.

112 To confirm the cap making behavior is not different from the behavior in the detailed report [Dem-  
113 bowska (1926)McLay (1983)], We video recorded the behavior from the two crabs. They are used only  
114 for this recording in the aquarium (310 mm x 180 mm x 240 mm). The recording was continued more  
115 than three hours after they were into the aquarium with the sponge. We repeated the recording 5 times for  
116 each crab.

## 117 **Statistical modeling**

118 In order to quantify and extract the structure of the behavioral aspects including individuality, we explored  
119 26 statistical models constructed for the four different aspects of the behavior: (1) choice of sponge size (6  
120 models), (2) cutting behavior (8 models), (3) cap hole making behavior (6 models), (4) time until carrying  
121 the sponge (6 models). In either case, we constructed the models that explicitly include individuality as  
122 the hierarchical (or multi-level) models and computed the posterior distribution of the parameters. We  
123 implemented the models in a probabilistic programming language Stan [Stan Development Team (2018)].  
124 We used non-informative uniform priors for the parameters unless it is explicitly described. The performed  
125 sampling from the posterior distributions using No-U-Tern Sampler (NUTS), which is implemented as a  
126 Hamiltonian Monte Carlo (HMC) sampler in Stan. Whether the sampling was converged was diagnosed  
127 by trace plots and quantitatively via the Gelman-Rubin convergence statistic,  $R_{hat}$  Gelman et al. (1992).  
128 All of the draws were judged to converge when  $R_{hat} < 1.10$ .

129 We compared the predictive performances of the models using WAIC. To give the essence of the  
130 models, we will explain only the best-performed models in terms of WAIC in this section. The other  
131 models are, for example, without the explanatory variables or without the individuality (Table 1). It should  
132 be emphasized that WAIC must be computed with the marginalization of the parameters assigned to each  
133 individual (marginal-level WAIC) to construct a predictive distribution [Watanabe (2018), Millar (2018)].  
134 In our case, we are interested in the prediction of a new data when we get a new individual and get a new  
135 behavioral act instead of the prediction of a new behavioral act from the individuals sampled in this study.  
136 WAIC is an estimator of the generalization error of the models to the true models generating data. We  
137 assessed the model predictability by this WAIC, not by the conditional-level WAIC which is beginning  
138 to be used without the consideration of this point. We did in the same way in all hierarchical models  
139 built in this study. All the computations were performed in the statistical environment R [R Core Team  
140 (2018)], and the Stan codes for each model were compiled and executed through the R package *rstan*  
141 [Stan Development Team (2018)].

### 142 **behavioral choice of material size (model 1.1)**

143 The crabs did not choose S size sponge and unexpectedly abandoned the choice itself. Therefore,  
144 we formulated the tendency to a choice of a certain sponge  $\mu[n, m]$  ( $m = 1, 2, 3$  for M, L, no choice,  
145 respectively). The  $\mu$  is expressed as the linear predictor in terms of the carapace width,  $Cwidth[n]$  and the  
146 degree of leg lack,  $LegLack[n]$ . The choice for M size was fixed to zero, and the parameters of other two  
147 choices were inferred as the comparison with the M size choice,

$$\begin{aligned}\mu[n, 1] &= 0, \\ \mu[n, 2] &= a_{choice_L} [ID[n]] + b_{choice_L} * Cwidth[n] + c_{choice_L} * LegLack[n], \\ \mu[n, 3] &= d_{choice_0} + e_{choice_0} * Cwidth[n] + f_{choice_0} * LegLack[n], \\ n &= 1, \dots, N_{act}.\end{aligned}$$

148  $N_{act}$  is the total number of behavioral acts.  $ID$  represents animal identity. It should be noted that we  
 149 could not collect repeated data from some animals. The local parameters  $a_{choice_L}[ID[n]]$  are the intercepts  
 150 for each individual. The parameter  $d_{choice_0}$  does not include individuality because the number of no choice  
 151 was small. The  $a_{choice_L}[ID[n]]$  is subjected to normal distribution with the mean  $a_{choice_{L0}}$  and standard  
 152 deviation  $a_{choice_{Ls}}$ ,

$$a_{choice_L}[k] \sim Normal(a_{choice_{L0}}, a_{choice_{Ls}}),$$

$$k = 1, \dots, N_{animal}.$$

153 The actual choice  $Choice[n]$  is subjected to the categorical distribution via the softmax function,

$$Choice[n] \sim Categorical(\text{softmax}(\mu[n])), n = 1, \dots, N_{act}.$$

#### 154 **cutting and removing (model 2-1)**

155 The probability  $\phi[n]$  for the decision whether the animal cut off the sponge is linked to the linear predictor  
 156 with the terms of carapace width,  $Cwidth[n]$  and selected sponge size,  $Choice[n]$ ,

$$\phi_{cut}[n] = InverseLogit(a_{cut}[ID[n]] + b_{cut} * Cwidth[n] + c_{cut} * Choice[n]), n = 1, \dots, N_{act}.$$

157 The parameters  $a_{cut}[ID[n]]$  are the intercepts for each individual. The  $a_{cut}[k]$  is subjected to the normal  
 158 distribution with the mean  $a_{cut_0}$  and the standard deviation  $a_{cut_s}$ ,

$$a_{cut}[k] \sim Normal(a_{cut_0}, a_{cut_s}), k = 1, \dots, N_{animal}.$$

The prior of  $a_{cut_s}$  is subjected to the half t distribution,

$$a_{cut_s} \sim Student\ t^+(4, 0, 10).$$

159 How much the animal removed the sponge on average  $\lambda[n]$  also can be linked to the linear predictor  
 160 with the same terms by the log link function,

$$\log(\lambda_{cut}[n]) = d_{cut}[ID[n]] + e_{cut} * Cwidth[n] + f_{cut} * Choice[n], n = 1, \dots, N_{act}.$$

161 The parameters  $d_{cut}[ID[n]]$  is the other intercepts for each individual. The  $d_{cut}[k]$  is subjected to the  
 162 normal distribution with the mean  $d_{cut_0}$  and the standard deviation  $d_{cut_s}$ ,

$$d_{cut}[k] \sim Normal(d_{cut_0}, d_{cut_s}), k = 1, \dots, N_{animal}.$$

The prior of  $d_{cut_s}$  is subjected to the half t distribution,

$$d_{cut_s} \sim Student\ t^+(4, 0, 10).$$

163 Altogether, the measured quantity of how much the animal removed the sponge as the response  
 164 variable  $Removed[n]$  is subjected to the zero-inflated Poisson distribution (ZIP) with the parameters  $\phi_{cut}[n]$   
 165 and  $\lambda_{cut}[n]$ ,

$$Removed[n] \sim ZIP(\phi_{cut}[n], \lambda_{cut}[n]), n = 1, \dots, N_{act}.$$

166 When the crab skipped cutting behavior, the  $Removed[n]$  was set to zero even if the sponge size is  
 167 smaller than the defined sizes of M or L due to measurement error. Additionally, the  $Removed[n]$  was  
 168 rounded to an integer to apply this model. The rounding process was judged to have no impact on the data  
 169 distribution.

170 **cap hole making (model 3.1)**

171 To examine how the cap hole size  $HoleSize[n]$  is explained by the carapace width  $Cwidth[n]$ , the gamma  
172 distribution was chosen to represent non-negative hole size data. The shape and rate parameters were  
173 given as follows

$$HoleSize[n] \sim Gamma(shape, shape/exp(a_{hole}[ID[n]] + b_{hole} * Cwidth[n])),$$
$$n = 1, \dots, N_{act}.$$

174 where the rate parameter was given as the shape over the log linked linear predictor. The  $a_{hole}[ID[n]]$  are  
175 the intercepts for each individual. The  $a_{hole}[k]$  is subjected to the normal distribution with the mean  $a_{hole_0}$   
176 and the standard deviation  $a_{hole_s}$ ,

$$a_{hole}[k] \sim Normal(a_{hole_0}, a_{hole_s}), k = 1, \dots, N_{animal}.$$

177 **time for making (model 4.1)**

178 We assumed that the time for making until the animal carries the sponge,  $Days[n]$ , which is similar to the  
179  $Removed[n]$  case, is subjected to the ZIP distribution,

$$\phi_{day}[n] = InverseLogit(a_{day}),$$
$$\log(\lambda_{day}[n]) = b_{day}[ID[n]],$$
$$b_{day}[k] \sim Normal(b_{day_0}, b_{day_s}), k = 1, \dots, N_{animal},$$
$$Days[n] \sim ZIP(\phi_{day}[n], \lambda_{day}[n]), n = 1, \dots, N_{act}.$$

180 As described above, we also considered the individuality so that the parameters  $b_{day}[ID[n]]$  were into  
181 this model.

182 **RESULTS**

183 **Cap making using an artificial sponge**

184 The behavior was video recorded specifically from the two crabs other than the individuals for the  
185 behavioral experiments to be described in the following sections. They usually grasped either side of  
186 the sponge by the second and third pereopods (Fig. 1A). They tore off small pieces of the sponge by  
187 chelae (Fig. 2A upper left, upper right, Supplementary movie 1). Sometimes they moved to another side  
188 of the sponge. By repeating these behaviors, the crabs made the groove to cut off the clod of sponge. On  
189 average, it took about 50 minutes for the crabs to cut the clod, and in 9 trials, the crabs started digging  
190 as soon as they finished removing. Next, the crabs made a hole by tearing off small pieces of sponge  
191 (Fig. 2A bottom, Supplementary movie 2). It took 11 minutes to dig the hole on average. Then the crabs  
192 rotated their body backward in order to catch it by fourth and fifth pereopods while they kept the clod  
193 grasping by second and third pereopods. Finally, the crabs released the second and third pereopods from  
194 the cap and began to carry it (Fig. 2B, C). In the digging behavior, it often happened that they rotated  
195 their body forward and dug it to make the hole larger. They repeated this process up to eleven times per  
196 night and it took up to five hours. When the crabs rotated their body, the direction of the rotation was  
197 maintained along with the sponge. While the crabs cut the sponge, they actively moved around the sponge.  
198 In contrast, they persistently kept under the sponge during digging to make a hole.

199 We will describe the results of the modeling the variables (1) cap choice, (2) removing size, (3) cap  
200 hole size, and (4) time for cap making, in the next sections.

201 **Cap choice**

202 All the 38 animals did not choose the S size sponge, and 7 animals abandoned the cap making behavior  
203 itself (Fig. 3A). Therefore, we defined the choice as the random variable taking three behavioral choices,  
204 M or L or no choice. The hierarchical model assuming individuality in the model 1.1 (Fig. 3A, B)  
205 remarkably outperformed the non-hierarchical one in terms of WAIC (-2.13 to 0.87, Fig. 3A-D Table. 1).  
206 The posterior probability of the behavioral choices, were more widely variable in the model 1.1 than 1.6  
207 depending on the individual difference specified as  $a_{choice_L}$  (Fig. 3B). The probability of choice sampled  
208 from the posterior distribution is visualized in white lines (Fig. 3A,C). For example, although the animal

209 indicated with the white arrowhead (Fig. 3A) is small, but preferably selected the size L. In either case of  
210 hierarchical or non-hierarchical model, the behavioral choice of the sponges was better explained by the  
211 carapace width (Fig. 3A,C), suggesting larger crabs tended to choose L size sponge rather than M size.  
212 However, the crabs whose carapace width becomes larger than about 9 cm did not choose the sponges.

### 213 **Cutting and removing behavior**

214 After the choice of M or L size sponge, the crabs decided to remove the extra part of the sponge or not  
215 (Fig. 4). Here we model how much the crabs removed the sponge. The removed sponge showed three  
216 patterns (Fig. 4B). They cut off (1) the four corners of the sponge, (2) one corner of it elliptically, (3) two  
217 corners of it linearly. The twenty three crabs skipped cutting in 33 trials.

218 The removing behavior showed two paths. One path was that the crabs decided to remove the sponge  
219 and then decided how much they remove the sponge. The other path was that they skipped removing,  
220 and started digging. For the first path, the non-zero data points indicating the removed size of the sponge  
221 decreased with the increase of the carapace width. For the second path, the data points are positioned at  
222 zero (Fig. 4C).

223 The WAIC score of the hierarchical model 2\_1 was -2.08 and the score of counterpart non-hierarchical  
224 model 2\_6 was 7.40 (Fig. 4D, Table 1). The tendency of decreasing of removed size can be recognized  
225 when the choice is fixed to L size in the predictive density of both of the models (Fig. 4C,D).

### 226 **Cap hole and body size**

227 The six crabs just cut the sponge and did not dig. We modeled the cap hole size as a random variable  
228 subjected to the gamma distribution with the log link function (Fig. 5). The cap hole size increased with  
229 the carapace width, as well as the model with the individuality best performed in the predictability (Table  
230 1). WAIC of the hierarchical model 3\_1 (4.45) is smaller than that of the counterpart non-hierarchical  
231 model 3\_2(4.54) (Fig. 5A,B, Table 1). The individual with the arrowhead made relatively large cap  
232 holes(Fig. 5A), indicating the individual bias of the behavior.

### 233 **Time for making process**

234 We modeled the time for making (from the choice of sponge to carrying) as a random variable subjected  
235 to zero-inflated distribution (Fig. 6). No obvious relation between the carapace width and the number of  
236 days until the crabs carried the first cap, and a number of crabs had carried the cap by next day. However,  
237 the hierarchical model 4\_1 outperformed the model 4\_2 as the non-hierarchical model (WAIC values, 1.10  
238 and 1.28 respectively).

## 239 **DISCUSSION**

240 We modeled the four variates, (1) choice of sponge size, (2) removed size, (3) cap hole size, and (4) time  
241 for making, as random variables with the hierarchical structures. When these models were compared  
242 with the non-hierarchical versions of the models, marginal-level WAIC values [Millar (2018)] favored  
243 hierarchical models in all of the four variates. Therefore, our assumption of individuals for the behavioral  
244 data is considered to be appropriate in terms of the model predictability.

### 245 **Functional role of cap**

246 It is expected that the crabs extending their body in order to camouflage and defend themselves [Dem-  
247 bowska (1926), McLay (1983), Bedini et al. (2003)] with repellent effect of the sponge [Cariello and  
248 Zanetti (1979)]. In particular, some homolid crabs are reported to carry not only sponges or ascidians but  
249 also sea anemones [Chintiroglou et al. (1996)], and they drive away their predators with these materials  
250 [Braga-Henriques et al. (2012)]. In addition, it is observed that sponge crabs carry not only sponges or  
251 ascidians but also sea anemones [Guinot et al. (1995), Lavaley and Den Hartog (1995)] or bivalve shells  
252 [Wicksten (1986b), Guinot et al. (2013), Guinot and Wicksten (2015)]. As Bedini et al. [Bedini et al.  
253 (2003)] expected, the main impulse of camouflaging crabs is to cover themselves even if the materials do  
254 not contain certain repellent chemicals. Similarly, the crabs in this study would carry caps to hide their  
255 body with top priority. One individual lacking third, fourth, and fifth pereopods of the right side even  
256 carried the cap once during five trials. The crabs may prefer toxic materials, but no materials with the  
257 toxic chemicals available in this study.

258 Many similarities were observed in the cap making behavior of *L. dehaani* with other crabs such as  
259 *D. personata* and *C. hilgendorfi* [Dembowska (1926), McLay (1983)]. From the video recordings, we  
260 described all of the cap making behavioral sequence, and the sponge crabs were found to process both  
261 natural sponges and artificial sponges in a similar way. However, in *C. hilgendorfi* it took 30 to 45 minutes  
262 for making and donning [McLay (1983)], but *L. dehaani* took longer times for making (50 minutes). In  
263 contrast to the case of *C. hilgendorfi*, *L. dehaani* repeated digging behavior up to eleven times, suggesting  
264 that there might be species specificity in the making time. In the larger time scales, there was no clear  
265 positive correlation between the size of crabs and the days to make caps (Fig. 8, Table 1). Dembowska  
266 [Dembowska (1926)] qualitatively reported that the younger *D. personata* make caps earlier than old  
267 individuals. We counted the days the crabs took to make caps, but the time resolution would be too large  
268 to detect the correlation. A further study measuring the time with less time resolution such as minutes to  
269 hours might detect the correlation. Additionally, further controlled experiments for testing the time and  
270 the risk sensitivity will be required.

### 271 **Making cost and size choice: why the crab abandoned carrying sponge?**

272 There are not so many marine animals showing the decorating behavior, because this behavior would  
273 compel the animal to pay the energetic cost. For example, the adult males of *Oregonia gracilis* tended to  
274 decorate less than the juveniles or adult females and this would be because of the energetic cost of the  
275 adult males to maintain their large claws increases and they could not pay the cost for decorating [Berke  
276 and Woodin (2008a)]. In this experiment, the size of the crabs that did not carry caps was larger than that  
277 carried caps. When they grow up to some extent, the number of predators for them would be limited and  
278 the energetic cost to make caps might increase so that larger individual would not make the caps.

279 Another possibility for why the crabs abandoned carrying sponge is that the sponges used in this  
280 experiment were smaller than those of necessary size for the crabs. Dembowska [Dembowska (1926)]  
281 reported that the proportion of caps to the size of *D. personata* tended to decrease with the size of the  
282 crabs, and considered that this was because there were few sponges fitting to the large crabs. Similarly,  
283 the large crabs that abandoned the choice itself, would carry the cap if the sponge size would be larger  
284 than the L size sponge. In contrast, there were no individuals that carried the S sponge in this study. This  
285 may be because it was too small for all of the crabs to carry. It is likely that the crabs younger and smaller  
286 than those we used in this experiment would carry the S sponge.

### 287 **Integrated extended body**

288 To make the living or non-living materials suitable to the animal body design, the animals choose and  
289 sometimes customize the material. Hermit crabs are well known to prefer specific shells [Bertness (1980),  
290 Hazlett (1981), Wilber (1990)]. Although hermit crabs cannot modify the shells by themselves, for  
291 example, the terrestrial hermit crabs, *Coenobita rugosus*, are suggested to recognize and learn the shape of  
292 extended shells and the surrounding terrain. When the experimenter attached a plastic plate to change the  
293 shell size, the hermit crabs adapted to the new shell by swiftly changing their walking behavior [Sonoda  
294 et al. (2012)].

295 Among vertebrates, the primates such as chimpanzees and gorillas [e.g. Boesch and Boesch (1990),  
296 Breuer et al. (2005)] and the birds such as crows [Hunt (1996) Matsui and Izawa (2017)] have been studied  
297 as tool users. On the other hand, among invertebrates, it is known that octopuses use coconuts as defensive  
298 tools [Finn et al. (2009)] and insects, for instance bumblebees, are able to perform the task in which  
299 they have to use surrounding materials [Loukola et al. (2017)]. Some crustacean, such as green crabs  
300 and American lobster are able to perform instrumental conditioning [Abramson and Feinman (1990),  
301 Tomina and Takahata (2010)]. Our findings demonstrated that not only the crabs can modify the cap size  
302 depending on the current body size during the inter-molt period, but also they have an individual bias  
303 emerging in the behavioral data captured in the hierarchical models. Although the possibility can not  
304 be excluded that the source of the bias is from genetic properties, we propose a possibility that unique  
305 experience through interactions with their environments would develop the individuality not reset by the  
306 molt cycle.

## 307 **FIGURE LEGENDS**

308 **Figure 1. Experimental animal and setup.** (A) A drawing of *Lauridromia dehaani*; p—propodus  
309 of fifth pereopod; d—dactylus of fifth pereopod; c—chela (1st pereopod); 2p—second pereopod;

310 3p—third pereopod; 4p—fourth pereopod; 5p—fifth pereopod; (B) carapace width; (C) position of the  
311 three different sizes of sponge and the crab in the experiment.

312 **Figure 2. The cap making behavior consists of cutting to change the size of the cap, digging to**  
313 **change the size of the hole, and carrying.** (A) The cap making behavior. *L. dehaani* grasps either side  
314 of the sponge and tears off small pieces of sponge to make the groove. After cutting the clod of sponge,  
315 the crab makes the hole on it. Then the crab rotates their body backward and grasps it by the fourth  
316 and fifth pereopods. It often happened that the crab rotated their body forward and dug it repeatedly to  
317 make the hole larger. (B–C) The carrying behavior of the crab. It carries a cap made from an artificial  
318 sponge. (B) Frontal view; (C) Right side of the crab; The tips of dactylus of the fourth and fifth pereopods  
319 elongate in opposite directions and grasp the sponge tightly.

320 **Figure 3. The choice of sponge size with the posterior predictive distributions.** (A) The predictive  
321 distribution with the data points of the behavioral choices, which are M or L size choices or abandon of  
322 the choices, in the graded color map of the hierarchical model assuming the individuality. The dotted  
323 lines connecting the square points represent the data from the same individual repeatedly. For example,  
324 the individual pointed by the white arrowhead preferred the L size sponge repeatedly even if this animal  
325 is small. The white lines are ten samples in decreasing order from the highest posterior density of the  
326 parameter representing the probability of the choice L and no choice when compared with the choice M.  
327 (B) The structure of the model 1\_1 in a graphical model. The  $a_{choice_L}$  is the latent parameters ( $N_{animal}$ )  
328 assigned to each individual to specify the hierarchy. The variables whose first letter are written in capital  
329 and small letters represent observed data ( $N_{act}$ ) and parameters to be estimated, respectively. (C) The  
330 predictive distribution of the choices of the non-hierarchical model 1\_6. Note that the variability of the  
331 choice probability in white curved lines is smaller than the model 1\_1. (D) The model structure of the  
332 model 1\_6 in a graphical model. The predictive performances measured in WAIC indicates that the model  
333 1\_1 of the hierarchical model (-2.13) remarkably outperformed the WAIC of the model 1\_6 (0.85).

334 **Figure 4. The predictive distributions of how much sponge was removed.** (A) The outline of the  
335 removing process from the choice of the sponge, removing (part of animals skipped this behavior), to  
336 the hole making. (B) The three patterns of cutting. Upper: cutting the four corners; Middle: cutting  
337 elliptically; Bottom: cutting linearly. The crabs removed the white area and started making a cap with  
338 the dotted area. (C) Upper plot: The predictive distribution of the hierarchical model 2\_1. The white  
339 dotted lines connect the data points from the same individual. When the animals choose the M size  
340 sponges, almost all of the animals except for one individual decided not to remove the sponge, whereas  
341 they removed the sponge in relation to their body sizes when they choose the L size sponges. Lower plot:  
342 The predictive distribution visualized by re-scaling the color density of the expanded area in the upper  
343 plot except for the zero in the y-axis. (D) The predictive distribution of the non-hierarchical model 2\_6.  
344 The bright area mismatches the data points except for the non-removing points. Note that the WAIC of  
345 the hierarchical model (-2.08) is remarkably smaller than the non-hierarchical one (7.40).

346 **Figure 5. The predictive distributions of the cap hole size.** (A) The hierarchical model. The data  
347 points connected with the white dotted lines are from one individual. Predictably, the larger size of crabs  
348 made the larger size of holes. The difference of the WAIC scores is about 0.1, thus the hierarchical model  
349 is more predictable than the non-hierarchical one. The improvement of the predictability might show that  
350 relatively small room for the individuality other than the body size to determine the cap hole size.

351 **Figure 6. The predictive distributions of the time the crabs took for cap making.** (A) The hierarchi-  
352 cal model. The days that the animal took until carrying the sponge as a function of the carapace width  
353 are shown with the points and those from the same individual are connected with dotted lines. (B) The  
354 non-hierarchical model. (C) The outline of the cap making until carrying. Both of the models assume  
355 that the mean parameter is constant while the carapace width changes. We applied the zero-inflated  
356 Poisson model to the time variable. The hierarchical model outperformed non-hierarchical one in terms  
357 of WAIC (1.10 and 1.28 respectively), indicating the assumption of the individual would be appropriate  
358 for this data.



| response variable | model | hierarchical structure   | explanatory variables      | link function | distribution | WAIC  | dWAIC | plot   |
|-------------------|-------|--------------------------|----------------------------|---------------|--------------|-------|-------|--------|
| Choice            | 1.1   | intercept_L              | CW_L, Leg_L, CW_NO, Leg_NO | softmax       | categorical  | -2.13 | 0.00  | Fig.3A |
| Choice            | 1.2   | intercept_L              | CW_L, CW_NO                | softmax       | categorical  | -1.87 | 0.26  | -      |
| Choice            | 1.3   | intercept_L              | -                          | softmax       | categorical  | -0.88 | 1.25  | -      |
| Choice            | 1.4   | intercept_L              | Leg_L, Leg_NO              | softmax       | categorical  | -0.78 | 1.35  | -      |
| Choice            | 1.5   | -                        | CW_L, CW_NO                | softmax       | categorical  | 0.85  | 2.99  | Fig.3C |
| Choice            | 1.6   | -                        | CW_L, Leg_L, CW_NO, Leg_NO | softmax       | categorical  | 0.87  | 3.01  | -      |
| Removed size      | 2.1   | intercept_1, intercept_2 | CW, Choice                 | logit, log    | ZIP          | -2.08 | 0.00  | Fig.4A |
| Removed size      | 2.2   | intercept_2              | Choice                     | logit, log    | ZIP          | 0.81  | 2.89  | -      |
| Removed size      | 2.3   | intercept_2              | CW, Choice                 | logit, log    | ZIP          | 0.86  | 2.95  | -      |
| Removed size      | 2.4   | intercept_2              | -                          | logit, log    | ZIP          | 1.23  | 3.32  | -      |
| Removed size      | 2.5   | intercept_2              | CW                         | logit, log    | ZIP          | 1.37  | 3.46  | -      |
| Removed size      | 2.6   | -                        | CW, Choice                 | logit, log    | ZIP          | 7.40  | 9.48  | Fig.4B |
| Removed size      | 2.7   | -                        | CW                         | logit, log    | ZIP          | 10.05 | 12.13 | -      |
| Removed size      | 2.8   | -                        | -                          | logit, log    | ZIP          | 12.55 | 14.63 | -      |
| Cap hole size     | 3.1   | intercept                | CW                         | log           | gamma        | 4.45  | 0.00  | Fig.5A |
| Cap hole size     | 3.2   | -                        | CW                         | log           | gamma        | 4.54  | 0.08  | Fig.5B |
| Cap hole size     | 3.3   | -                        | CW, Gender                 | log           | gamma        | 4.69  | 0.24  | -      |
| Cap hole size     | 3.4   | intercept                | -                          | log           | gamma        | 4.71  | 0.26  | -      |
| Cap hole size     | 3.5   | -                        | CW                         | identity      | normal       | 4.75  | 0.30  | -      |
| Cap hole size     | 3.6   | intercept, cw            | CW                         | log           | gamma        | 6.18  | 1.73  | -      |
| Time for making   | 4.1   | intercept_2              | CW                         | logit, log    | ZIP          | 1.10  | 0.00  | Fig.6A |
| Time for making   | 4.2   | intercept_2              | -                          | logit, log    | ZIP          | 1.28  | 0.18  | -      |
| Time for making   | 4.3   | -                        | -                          | logit, log    | ZIP          | 1.28  | 0.19  | Fig.6B |
| Time for making   | 4.4   | -                        | Choice                     | logit, log    | ZIP          | 1.30  | 0.20  | -      |
| Time for making   | 4.5   | -                        | CW                         | logit, log    | ZIP          | 1.38  | 0.28  | -      |
| Time for making   | 4.6   | -                        | CW, Choice                 | logit, log    | ZIP          | 1.72  | 0.62  | -      |

**Table 1. Summary of model structures and the predictive performances.** Abbreviations, intercept\_L: intercept in the linear predictor (LP) for the choice of L; intercept\_1: intercept in the LP for the decision of cutting; intercept\_2: intercept in the LP for the mean of the removed size of the sponge; cw: slope in the LP for the carapace width; CW: carapace width; Leg: degree of the leg lack; \_L and \_NO: parameters for L sponge and no choice, respectively; Choice: choice whether to cut the sponge; Gender: gender of the animal; intercept\_2: intercept in the LP for the mean of the days to carrying; Choice: choice of sponge size; ZIP: Zero-inflated Poisson distribution; WAIC: Widely-Applicable Information Criterion; dWAIC: the difference of the WAIC of the model and the best-performed model.

## 359 ACKNOWLEDGMENTS

360 We thank the Shirahama aquarium for use of the aquarium tanks, and the Sakai fishing port for the offers  
361 of the crabs.

## 362 REFERENCES

- 363 Abramson, C. I. and Feinman, R. D. (1990). Lever-press conditioning in the crab. *Physiology & behavior*,  
364 48(2):267–272.
- 365 Akaike, H. (1974). A new look at the statistical model identification. In *Selected Papers of Hirotugu*  
366 *Akaike*, pages 215–222. Springer.
- 367 Bedini, R., Canali, M. G., and Bedini, A. (2003). Use of camouflaging materials in some brachyuran  
368 crabs of the mediterranean infralittoral zone. *Cahiers de biologie marine*, 44(4):375–383.
- 369 Berke, S. K. and Woodin, S. A. (2008a). Energetic costs, ontogenetic shifts and sexual dimorphism in  
370 spider crab decoration. *Functional Ecology*, 22(6):1125–1133.
- 371 Berke, S. K. and Woodin, S. A. (2008b). Tube decoration may not be cryptic for diopatra cuprea  
372 (polychaeta: Onuphidae). *The Biological Bulletin*, 214(1):50–56.
- 373 Bertness, M. D. (1980). Shell preference and utilization patterns in littoral hermit crabs of the bay of  
374 panama. *Journal of Experimental Marine Biology and Ecology*, 48(1):1–16.
- 375 Blanke, O. and Metzinger, T. (2009). Full-body illusions and minimal phenomenal selfhood. *Trends in*  
376 *cognitive sciences*, 13(1):7–13.
- 377 Boesch, C. and Boesch, H. (1990). Tool use and tool making in wild chimpanzees. *Folia primatologica*,  
378 54(1-2):86–99.
- 379 Braga-Henriques, A., Carreiro-Silva, M., Tempera, F., Porteiro, F. M., Jakobsen, K., Jakobsen, J.,  
380 Albuquerque, M., and Santos, R. S. (2012). Carrying behavior in the deep-sea crab paromola cuvieri  
381 (northeast atlantic). *Marine Biodiversity*, 42(1):37–46.

- 382 Breuer, T., Ndoundou-Hockemba, M., and Fishlock, V. (2005). First observation of tool use in wild  
383 gorillas. *PLoS Biology*, 3(11):e380.
- 384 Capezzuto, F., Maiorano, P., Panza, M., Indennidate, A., Sion, L., and D'Onghia, G. (2012). Occurrence  
385 and behaviour of paromola cuvieri (crustacea, decapoda) in the santa maria di leuca cold-water coral  
386 community (mediterranean sea). *Deep Sea Research Part I: Oceanographic Research Papers*, 59:1–7.
- 387 Cariello, L. and Zanetti, L. (1979). Suberitine, the toxic protein from the marine sponge, suberites  
388 domuncula. *Comparative Biochemistry and Physiology Part C: Comparative Pharmacology*, 64(1):15–  
389 19.
- 390 Chintiroglou, C. C., Doumenc, D., and Guinot, D. (1996). Anemone-carrying behaviour in a deep-water  
391 homolid crab (brachyura, podotremata). *Crustaceana*, 69(1):19–25.
- 392 De Carvalho, F., Rodrigues, R. d. O., Barreto, R., and Costa, T. M. (2016). Decoration behaviour in  
393 a spider crab, acanthonyx scutiformis (dana, 1851) in relation to life stage, sex and algal species.  
394 *Crustaceana*, 89(6-7):775–786.
- 395 Dembowska, W. S. (1926). Study on the habits of the crab dromia vulgaris me. *The Biological Bulletin*,  
396 50(2):163–178.
- 397 Finn, J. K., Tregenza, T., and Norman, M. D. (2009). Defensive tool use in a coconut-carrying octopus.  
398 *Current Biology*, 19(23):R1069–R1070.
- 399 Galbraith, S., Daniel, J. A., and Vissel, B. (2010). A study of clustered data and approaches to its analysis.  
400 *Journal of Neuroscience*, 30(32):10601–10608.
- 401 Gelman, A., Rubin, D. B., et al. (1992). Inference from iterative simulation using multiple sequences.  
402 *Statistical science*, 7(4):457–472.
- 403 Guinot, D., Doumenc, D., and Chintiroglou, C. C. (1995). A review of the carrying behaviour in  
404 brachyuran crabs, with additional information on the symbioses with sea anemones. *Raffles Bulletin of*  
405 *Zoology*, 43:377–416.
- 406 Guinot, D., Tavares, M., and Castro, P. (2013). Significance of the sexual openings and supplementary  
407 structures on the phylogeny of brachyuran crabs (crustacea, decapoda, brachyura), with new nomina  
408 for higher-ranked podotreme taxa. *Zootaxa*, 3665(1):1–414.
- 409 Guinot, D. and Wicksten, M. K. (2015). Camouflage: carrying behaviour, decoration behaviour, and other  
410 modalities of concealment in brachyura. In *Treatise on Zoology-Anatomy, Taxonomy, Biology. The*  
411 *Crustacea, Volume 9 Part C (2 vols)*, pages 583–638. Brill.
- 412 Hazlett, B. A. (1981). The behavioral ecology of hermit crabs. *Annual Review of Ecology and Systematics*,  
413 12(1):1–22.
- 414 Hunt, G. R. (1996). Manufacture and use of hook-tools by new caledonian crows. *Nature*, 379(6562):249.
- 415 Kagaya, K. and Patek, S. (2016). Feed-forward motor control of ultrafast, ballistic movements. *Journal*  
416 *of Experimental Biology*, 219(3):319–333.
- 417 Lavaleye, M. and Den Hartog, J. (1995). A case of associated occurrence of the crab lauridromia  
418 intermedia (laurie, 1906)(crustacea: Decapoda: Dromiidae) and the actinian nemanthus annamensis  
419 carlgren, 1943 (anthozoa: Actiniaria: Nemanthidae). *Zoologische Mededelingen*, 69(11):121–130.
- 420 Loukola, O. J., Perry, C. J., Coscos, L., and Chittka, L. (2017). Bumblebees show cognitive flexibility by  
421 improving on an observed complex behavior. *Science*, 355(6327):833–836.
- 422 Maldonado, M. and Uriz, M. J. (1992). Relationships between sponges and crabs: patterns of epibiosis on  
423 inachus aguiarii (decapoda: Majidae). *Marine Biology*, 113(2):281–286.
- 424 Matsui, H. and Izawa, E.-I. (2017). Flexible motor adjustment of pecking with an artificially extended bill  
425 in crows but not in pigeons. *Royal Society open science*, 4(2):160796.
- 426 McLay, C. (1982). Population biology of the sponge crab cryptodromia hilgendorfi (dromiacea) in  
427 moreton bay, queensland, australia. *Marine Biology*, 70(3):317–326.
- 428 McLay, C. (1983). Dispersal and use of sponges and ascidians as camouflage by cryptodromia hilgendorfi  
429 (brachyura: Dromiacea). *Marine Biology*, 76(1):17–32.
- 430 McLay, C. (2001a). A new genus and two new species of unusual dromiid crabs (brachyura: Dromiidae)  
431 from northern australia. *RECORDS-AUSTRALIAN MUSEUM*, 53(1):1–8.
- 432 McLay, C. L. (1991). A small collection of deep water sponge crabs (brachyura, dromiidae) from french  
433 polynesia, including a new species of sphaerodromia alcock, 1899. *Bulletin du Muséum national*  
434 *d'Histoire naturelle*, 4(13):3–4.
- 435 McLay, C. L. (1993). Crustacea decapoda: the sponge crabs (dromiidae) of new caledonia and the  
436 philippines with a review of the genera. *Résultats des campagnes MUSORSTOM*, 10(5):111–251.

- 437 McLay, C. L. (2001b). The dromiidae of french polynesia and a new collection of crabs (crustacea,  
438 decapoda, brachyura) from the marquesas islands. *Zoosystema-Paris-*, 23(1):77–100.
- 439 McLay, C. L. (2001c). Dynomenidae and dromiidae (decapoda, brachyura) from guam, philippine islands,  
440 tonga and samoa. *ZOOSYSTEMA-PARIS-*, 23(4):807–856.
- 441 McLay, C. L. (2002). Foredromia rostrata, a new genus and species of sponge crab (decapoda, brachyura,  
442 dromiidae) from southeast asia. *CRUSTACEANA-INTERNATIONAL JOURNAL OF CRUSTACEAN*  
443 *RESEARCH-*, 75(3/4):505–516.
- 444 McLay, C. L. (2009). *New records of crabs (Decapoda: Brachyura) from the New Zealand region,*  
445 *including a new species of Rochinia A. Milne-Edwards, 1875 (Majidae), and a revision of the genus*  
446 *Dromia Weber, 1795 (Dromiidae)*. Magnolia Press.
- 447 Millar, R. B. (2018). Conditional vs marginal estimation of the predictive loss of hierarchical models  
448 using waic and cross-validation. *Statistics and Computing*, 28(2):375–385.
- 449 R Core Team (2018). *R: A Language and Environment for Statistical Computing*. R Foundation for  
450 Statistical Computing, Vienna, Austria.
- 451 Reinhart, A. (2015). *Statistics done wrong: The woefully complete guide*. No starch press.
- 452 Sakamoto, Y., Ishiguro, M., and Kitagawa, G. (1986). Akaike information criterion statistics. *Dordrecht,*  
453 *The Netherlands: D. Reidel*, 81.
- 454 Sonoda, K., Asakura, A., Minoura, M., Elwood, R. W., and Gunji, Y.-P. (2012). Hermit crabs perceive the  
455 extent of their virtual bodies. *Biology letters*, 8(4):495–497.
- 456 Stan Development Team (2018). *Stan Modeling Language Users Guide and Reference Manual Version*  
457 *2.18.0*.
- 458 Thanh, P. D., Wada, K., Sato, M., and Shirayama, Y. (2005). Effects of resource availability, predators,  
459 conspecifics and heterospecifics on decorating behaviour by the majid crab tiarinia cornigera. *Marine*  
460 *Biology*, 147(5):1191–1199.
- 461 Tomina, Y. and Takahata, M. (2010). A behavioral analysis of force-controlled operant tasks in american  
462 lobster. *Physiology & behavior*, 101(1):108–116.
- 463 Watanabe, S. (2010a). Asymptotic equivalence of bayes cross validation and widely applicable information  
464 criterion in singular learning theory. *Journal of Machine Learning Research*, 11(Dec):3571–3594.
- 465 Watanabe, S. (2010b). Equations of states in singular statistical estimation. *Neural Networks*, 23(1):20–34.
- 466 Watanabe, S. (2018). *Mathematical theory of Bayesian statistics*. CRC Press.
- 467 Wicksten, M. (1983). Camouflage in marine invertebrates. *Oceanogr. Mar. Biol. Ann. Rev.*, 21:177–193.
- 468 Wicksten, M. K. (1985). Carrying behavior in the family homolidae (decapoda: Brachyura). *Journal of*  
469 *crustacean biology*, 5(3):476–479.
- 470 Wicksten, M. K. (1986a). Carrying behavior in brachyuran crabs. *Journal of crustacean biology*,  
471 6(3):364–369.
- 472 Wicksten, M. K. (1986b). Shell-carrying in hypoconcha sabulosa (herbst, 1799)(decapoda, brachyura).  
473 *Crustaceana*, 50(3):319–320.
- 474 Wicksten, M. K. (1993). A review and a model of decorating behavior in spider crabs (decapoda,  
475 brachyura, majidae). *Crustaceana*, 64(3):314–325.
- 476 Wilber, T. (1990). Influence of size, species and damage on shell selection by the hermit crab pagurus  
477 longicarpus. *Marine Biology*, 104(1):31–39.
- 478 Wilby, D., Riches, S., Daly, I. M., Bird, A., Wheelwright, M., and Foster, J. J. (2018). Hermit crabs  
479 (pagurus bernhardus) use visual contrast in self-assessment of camouflage. *Journal of Experimental*  
480 *Biology*, 221(13):jeb173831.
- 481 Zuur, A., Ieno, E. N., Walker, N., Saveliev, A. A., and Smith, G. M. (2009). *Mixed effects models and*  
482 *extensions in ecology with R*. Springer Science & Business Media.

**Figure 1**

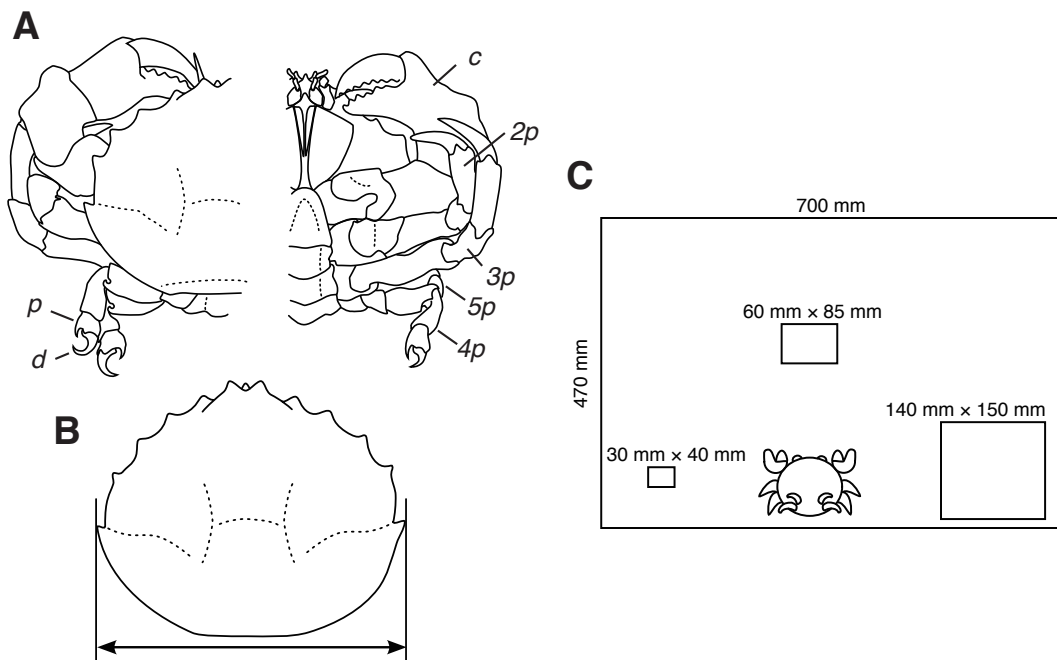

**Figure 2**

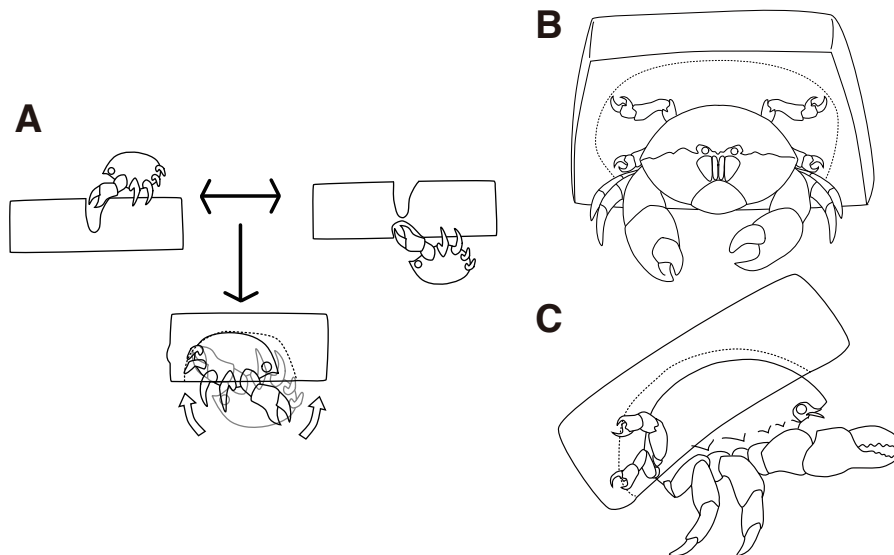

**Figure 3**

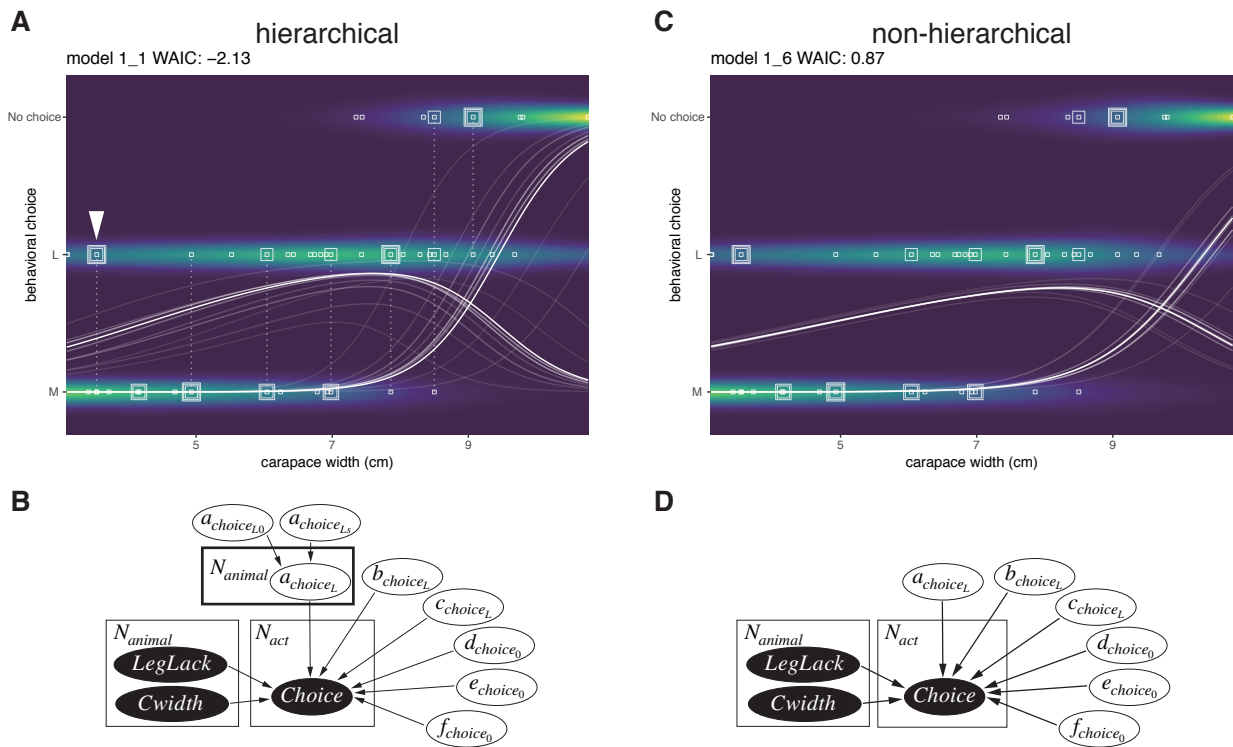

**Figure 4**

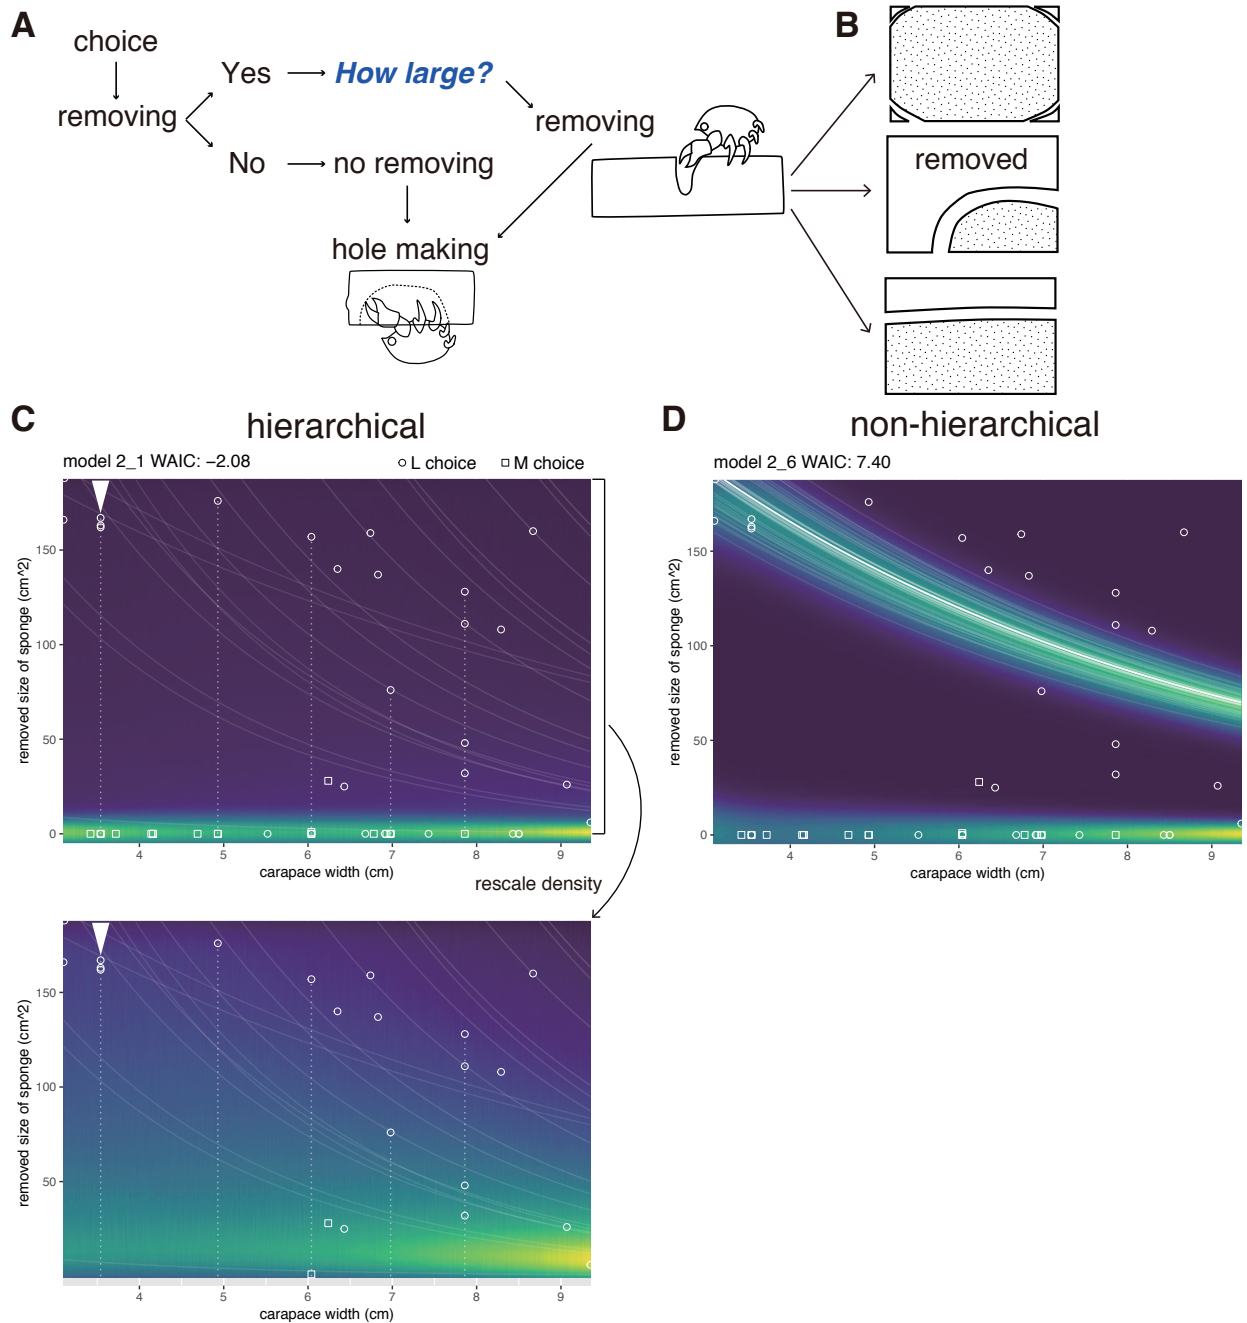

**Figure 5**

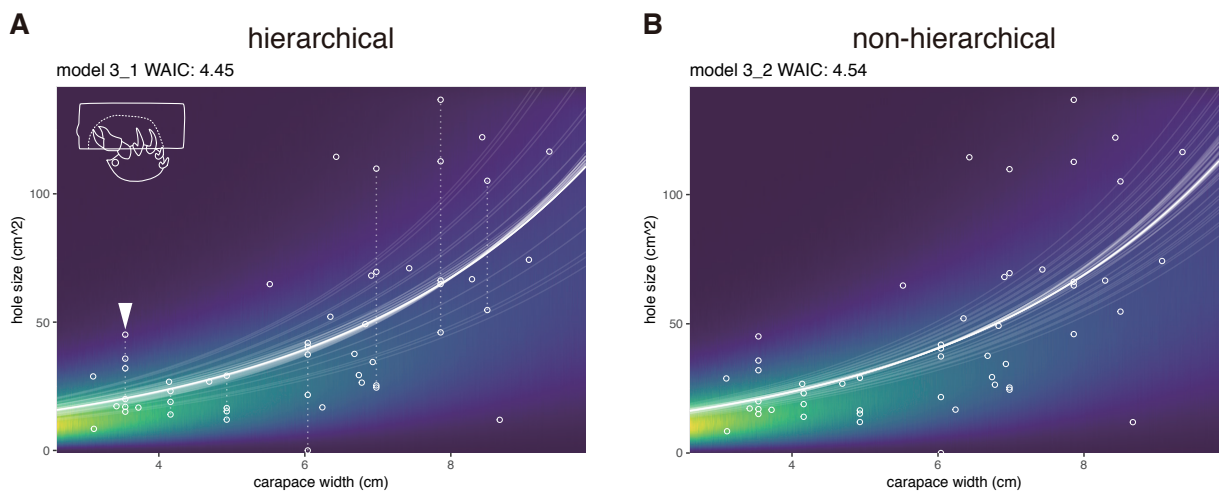



**Figure 6**

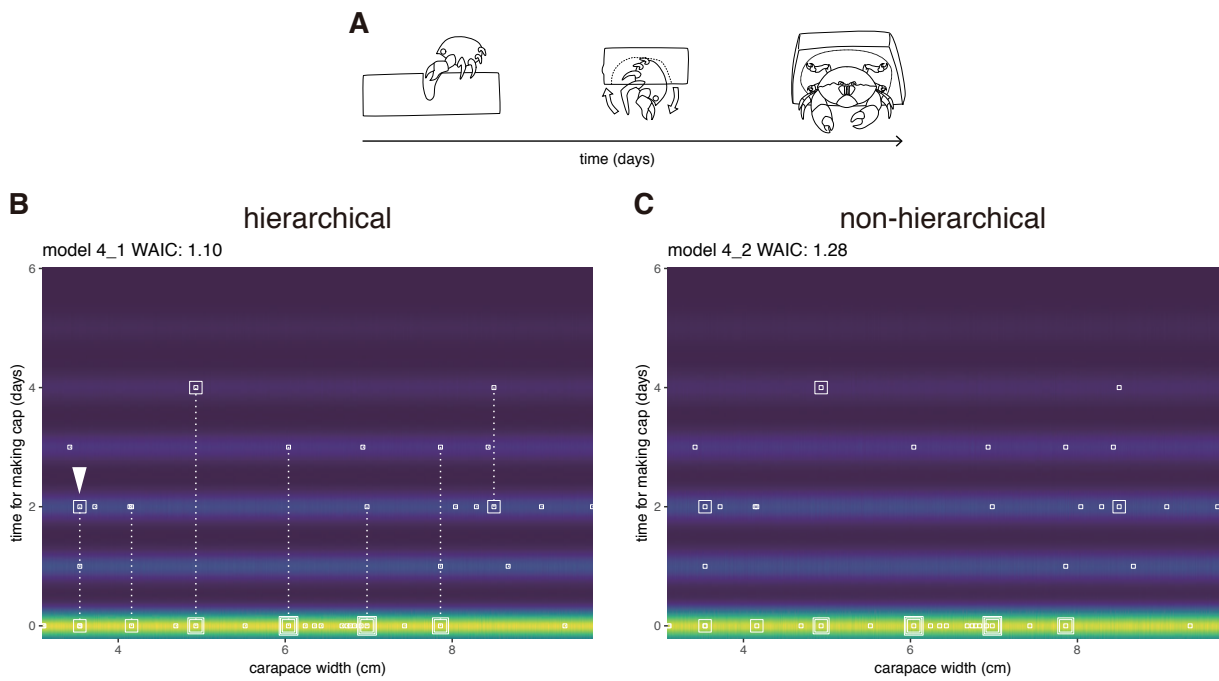

Source: https://www.biorxiv.org/content/10.1101/330787v9.full.pdf
